1       **Hematological and gene co-expression network analyses of high-risk beef cattle defines**  
2       **immunological mechanisms and biological complexes involved in bovine respiratory**  
3       **disease and weight gain**

4  
5       <sup>1</sup>Matthew A. Scott, <sup>2</sup>Amelia R. Woolums, <sup>3</sup>Cyprianna E. Swiderski, <sup>1</sup>Abigail Finley, <sup>4</sup>Andy D.  
6       Perkins, <sup>5</sup>Bindu Nanduri, <sup>6</sup>Brandi B. Karisch

7  
8       <sup>1</sup>Veterinary Education, Research, and Outreach Center, Texas A&M University and West Texas  
9       A&M University, Canyon, TX, USA, 79015; [matthewscott@tamu.edu](mailto:matthewscott@tamu.edu), [afinley@cvm.tamu.edu](mailto:afinley@cvm.tamu.edu)

10       <sup>2</sup>Department of Pathobiology and Population Medicine, College of Veterinary Medicine,  
11       Mississippi State University, Mississippi State, MS, USA, 39762; [amelia.woolums@msstate.edu](mailto:amelia.woolums@msstate.edu)

12       <sup>3</sup>School of Animal and Comparative Biomedical Sciences, University of Arizona, Tucson,  
13       Arizona, USA, 85721; [swiderski@arizona.edu](mailto:swiderski@arizona.edu)

14       <sup>4</sup>Department of Computer Science and Engineering, Mississippi State University, Mississippi  
15       State, MS, USA, 39762; [perkins@cse.msstate.edu](mailto:perkins@cse.msstate.edu)

16       <sup>5</sup>Department of Comparative Biomedical Sciences, College of Veterinary Medicine, Mississippi  
17       State University, Mississippi State, MS, USA, 39762; [bnanduri@cvm.msstate.edu](mailto:bnanduri@cvm.msstate.edu)

18       <sup>6</sup>Department of Animal and Dairy Sciences, Mississippi State University, Mississippi State, MS,  
19       USA, 39762; [brandi.karisch@msstate.edu](mailto:brandi.karisch@msstate.edu)

20

21       Correspondence to Matthew A. Scott

22       [matthewscott@tamu.edu](mailto:matthewscott@tamu.edu)

23

24

25

## 26 Abstract

27 Bovine respiratory disease (BRD), the leading disease complex in beef cattle production  
28 systems, remains highly elusive regarding diagnostics and disease prediction. Previous research  
29 has employed cellular and molecular techniques to describe hematological and gene expression  
30 variation that coincides with BRD development. Here, we utilized weighted gene co-expression  
31 network analysis (WGCNA) to leverage total gene expression patterns from cattle at arrival and  
32 generate hematological and clinical trait associations to describe mechanisms that may predict  
33 BRD development.

34 Gene expression counts of previously published RNA-Seq data from 23 cattle (2017;  
35 n=11 Healthy, n=12 BRD) were used to construct gene co-expression modules and correlation  
36 patterns with complete blood count (CBC) and clinical datasets. Modules were further evaluated  
37 for cross-populational preservation of expression with RNA-Seq data from 24 cattle in an  
38 independent population (2019; n=12 Healthy, n=12 BRD). Genes within well-preserved modules  
39 were subject to functional enrichment analysis for significant Gene Ontology terms and  
40 pathways. Genes which possessed high module membership and association with BRD  
41 development, regardless of module preservation (“hub genes”), were utilized for protein-protein  
42 physical interaction network and clustering analyses.

43 Five well-preserved modules of co-expressed genes were identified. One module  
44 (“steelblue”), involved in alpha-beta T-cell complexes and Th2-type immunity, possessed  
45 significant correlation with increased erythrocytes, platelets, and BRD development. One module  
46 (“purple”), involved in mitochondrial metabolism and rRNA maturation, possessed significant  
47 correlation with increased eosinophils, fecal egg count per gram, and weight gain over time.  
48 Fifty-two interacting hub genes, stratified into 11 clusters, may possess transient function  
49 involved in BRD development not previously described in literature. This study identifies co-  
50 expressed genes and coordinated mechanisms associated with BRD, which necessitates further  
51 investigation in BRD-prediction research.

52

## 53 Author Summary

54 Bovine respiratory disease (BRD), the leading disease in beef cattle, is a highly dynamic disease  
55 complex. Through simultaneous sequencing of thousands of genes active in the blood of cattle at  
56 arrival, we pursued the co-expression patterns of these genes to evaluate associations with BRD  
57 development and severity overtime. This approach allows for a better understanding of gene  
58 expression active in cattle at arrival, and the discovery of new molecules and biological  
59 complexes that may predict BRD before the onset of clinical signs. Our work provides evidence  
60 that genes related to T-cells, a type of immune cell, are strongly co-expressed when cattle arrive  
61 to beef production system, and correlate with increased red blood cell (RBC) factors and BRD  
62 development. Further analysis shows that genes involved in cellular energy production and the  
63 respiratory electron transport are strongly co-expressed when cattle arrive to beef production  
64 system, and correlate with increased eosinophils, a type of immune cell, and weight gain  
65 overtime. Additionally, using genes which strongly correlate with BRD development and  
66 severity overtime, we identify a novel protein interaction complex that may drive future research  
67 for discovering new ways to manage and treat BRD in beef cattle.

68

## 69 Introduction

70 Despite decades of research involved in discovering novel management tools, developing  
71 interventional systems, and advancing antimicrobial therapeutics, bovine respiratory disease  
72 (BRD) remains the leading cause of morbidity and mortality in beef cattle operations across  
73 North America [1,2,3]. Due to its widespread prevalence, BRD is considered one of the most  
74 economically devastating components of beef cattle production systems [2,3,4]. BRD is a  
75 polymicrobial, multifactorial disease complex, incorporating infectious agents, host immunity,  
76 and environmental elements as predisposing factors [5,6,7]. Previous research over the past  
77 several decades has greatly detailed these factors and risks associated with BRD, yet there is  
78 minimal evidence that overall rates of disease have improved [5,8,9,10]. Furthermore, diagnostic  
79 evaluation of BRD often relies on visual signs attributed to the disease complex, which are  
80 commonly non-specific to airway and lung disease, and lack clinical sensitivity [11,12].  
81 Therefore, data driven approaches which capture the biological intricacies associated with  
82 clinical BRD development and provide candidate molecular targets capable of stratifying or

83 predicting risk of disease and/or production loss would offer a more precise method of managing  
84 BRD.

85 Clinical BRD progression and severity often presents as an acute inflammatory disease  
86 [13]. However, molecular and cellular changes precede physiological changes in terms of disease  
87 development. As such, identifying consistent molecular and/or cellular components that relate to  
88 BRD development would allow for the development of rapid diagnostics capable of being  
89 performed with cattle at the time of facility arrival. Such a tool could facilitate precision  
90 medicine practices in stocker and feedlot operations and improve both speed and success of  
91 targeted therapy. Accordingly, hematological samples are ideal, as they represent a relatively  
92 noninvasive, cost effective, and readily obtainable source that reflects dynamic biological  
93 processes throughout the body [14,15].

94 Previous research has investigated cellular and molecular components that may indicate  
95 or predict clinical BRD. Richeson and colleagues, utilizing complete blood count (CBC)  
96 variables and castration status at facility arrival, identified significant associations with BRD in  
97 calves with comparatively decreased numbers of eosinophils and increased numbers of  
98 erythrocytes [16]. When evaluating the relationships between cytokine gene expression and CBC  
99 data in cattle with concurrent BRD, Lindholm-Perry and colleagues discovered that cattle with  
100 BRD possessed a comparative increase in numbers of neutrophils, decrease in numbers of  
101 basophils, and increased expression of *CCL16*, *CXCR1*, and *CCR1* [17]. Recent RNA sequencing  
102 studies, performed by both our group and others, have identified mechanisms and candidate  
103 biomarkers in whole blood associated with BRD development [18,19,20]. However, these  
104 studies primarily sought to identify differentially expressed genes (DEGs) between cattle that  
105 were or were not treated for BRD based on clinical signs. Focus on identifying DEGs meant that  
106 much of the data generated by these studies was neglected. Therefore, we aimed to leverage  
107 global gene expression patterns across high-risk cattle, and incorporate available cellular-level  
108 hematological data from the same cattle, to infer mechanisms associated with BRD development  
109 with a more holistic approach.

110 As gene expression operates in tandem with biological regulatory networks and  
111 complexes, investigation of gene co-expression levels may reveal transcriptional coordination,  
112 distinguish protein production relationships, and measure cellular composition and function

113 relevant to specific disease states such as BRD [21,22]. This analysis approach falls into the field  
114 of systems biology, where, in contrast to reductionist biology, molecular components are pieced  
115 and scaled together to better understand disease and generate novel hypotheses [23,24]. In this  
116 respect, we sought to build networks of co-expressed genes, utilizing the full structure of  
117 previously published gene expression data [20], and discover relationships between gene  
118 expression and cellular hematological components, which may elucidate and/or further confirm  
119 genes and mechanisms related to BRD development or resistance.

120

## 121 Materials and Methods

### 122 Animal enrollment

123 All animal use and procedures were approved by the Mississippi State University Animal  
124 Care and Use Committee (IACUC protocol #17-120) and carried out in accordance with relevant  
125 IACUC and agency guidelines and regulations. This study was carried out in accordance with  
126 Animal Research: Reporting of In Vivo Experiments (ARRIVE) guidelines  
127 (<https://arriveguidelines.org>). This study was conducted in accompaniment with previous work  
128 focused on differential gene expression analysis and candidate biomarker validation [20]; the  
129 RNA-Seq data of these animals were previously deposited in the National Center for  
130 Biotechnology Information (NCBI) Gene Expression Omnibus (GEO) database under accession  
131 number GSE161396. Of the 24 cattle from the 2017 population having RNA-Seq data, one  
132 individual (ID: 162-2017\_S24; GSM4906455) was not incorporated into the network analysis  
133 due to missing CBC data. The following clinical data were recorded for each animal: at-arrival  
134 fecal egg counts per gram via modified-Wisconsin procedure (FEC-d0), body weight in pounds  
135 (WT) at arrival, Day 12, Day 26, and Day 82, average daily weight gain at each time point  
136 (ADG), growth rate (slope of weight over days recorded; GR), at-arrival castration status (Sex),  
137 at-arrival rectal temperature (Temp-d0), development of clinical BRD within 28 days post-arrival  
138 (BRD), number of clinical BRD treatments (Treat\_Freq), and timing to first BRD treatment  
139 (Risk\_Days). Clinical data for these cattle are found in Supplemental Table S1.

140

141 Hematology analysis

142           Approximately 6 mL of whole blood was collected at arrival into K<sub>3</sub>-EDTA glass blood  
143 tubes (BD Vacutainer; Franklin Lakes, NJ, USA) via jugular venipuncture. Blood samples were  
144 stored at 4°C and analyzed the same day of collection with the flow cytometry-based Advia  
145 2120i hematology analyzer (Siemens Healthcare Diagnostics Inc., Tarrytown, NY, USA), testing  
146 for the following parameters: white blood cells (WBC; K/ $\mu$ L), erythrocytes (RBC; M/ $\mu$ L),  
147 hemoglobin (HGB; g/dL), hematocrit (HCT; %), mean corpuscular volume (MCV; fL), mean  
148 corpuscular hemoglobin (MCH; pg), mean corpuscular hemoglobin concentration (MCHC;  
149 g/dL), red blood cell distribution width (RDW; %), and platelets (PLT; K/ $\mu$ L). Blood smear  
150 staining was performed with a Hematek 3000 Slide Stainer (Siemens Healthcare Diagnostics  
151 Inc., Tarrytown, NY, USA) via Wright-Giemsa stain reagents. Stained blood smears were  
152 evaluated for leukocyte distribution via a manual 300-count white blood cell differential by  
153 trained clinical pathology technical staff at Mississippi State University College of Veterinary  
154 Medicine. Neutrophil, eosinophil, basophil, monocyte, and lymphocyte percentages were  
155 recorded, with accompanying neutrophil-to-lymphocyte ratios (NL Ratio). Hematology data for  
156 these cattle are found in Supplemental Table S2.

157

158 RNA-Seq data processing and normalization

159           The gene-level raw count matrix generated from our previous research was utilized for  
160 this study [20]. Briefly, RNA was isolated via Tempus Spin RNA Isolation Kits (Thermo Fisher  
161 Scientific; Waltham, MA, USA), following manufacturer's protocol. TruSeq RNA Library Kit  
162 v2 (Illumina; San Diego, CA, USA) was utilized for mRNA sequencing library preparation,  
163 following manufacturer's protocol. Single-lane, high-throughput RNA sequencing was  
164 performed with NovaSeq 6000 S4 reagent kit and flow cell (Illumina). Sequence read files were  
165 quality assessed and trimmed with FastQC v0.11.9 [25] and Trimmomatic v0.39 [26],  
166 respectively. Reference-guided (*Bos taurus*; ARS-UCD1.2) read mapping, indexing, and gene-  
167 level assembly were performed with HISAT2 v2.2.1 [27,28] and StringTie v2.1.2 [29,30],  
168 respectively. The python program prepDE.py [31] was utilized for gene-level count matrix  
169 construction.

170 Raw gene counts were imported to R v4.0.4 and processed with the filterByExpr toolkit  
171 [32], removing genes with a minimum total count of less than 200 and counts-per-million (CPM)  
172 below 1.0 across a minimum of 12 libraries. Libraries were normalized with the trimmed mean  
173 of M-values method (TMM) [33,34] and converted into log2-counts per million values  
174 (log2CPM). A total of 12,795 genes were identified after count processing and were utilized for  
175 weighted network analysis.

176

177 Weighted gene co-expression network analysis (WGCNA)

178 Weighted network analysis was performed with the R package WGCNA v1.70.3 [35].  
179 Clinical and hematology trait data were compiled and aligned to each respective sample library.  
180 To remove any outlier sample, canonical Euclidean distance-based network adjacency matrices  
181 were estimated and used to identify outliers based on standardized connectivity. Estimated  
182 adjacency matrices had network connectivity standardized with the provided equation [36]:

183 
$$Z.k_{\mu} = scale(k)_{\mu} = \frac{k_{\mu} - mean(k)}{\sqrt{var(k)}}$$

184 Samples with a standardized connectivity < -5.0 were considered outliers and to be removed  
185 from further analysis; no samples were considered outliers in this study (Supplemental Figure  
186 S1). An adjacency matrix was constructed from the calculated signed Pearson coefficients  
187 between all genes across all samples. We utilized signed networks as they better capture gene  
188 expression trends (up- and down-regulation) and classify co-expressed gene modules which  
189 improve the ability to identify functional enrichment, when compared to unsigned networks  
190 [24,35,36,37]. Soft thresholding was used to calculate the power parameter ( $\beta$ ) required to  
191 exponentially raise the adjacency matrix, to reach a scale-free topology fitting index ( $R^2$ ) of  
192 >80%;  $\beta = 8$  was selected for this study. The relationship between each unit  $\beta$  and  $R^2$  is seen in  
193 Supplemental Figure S2. Co-expression modules were constructed with the automatic, one-step  
194 blockwiseModules function within the WGCNA R package, using the following parameters:  
195 power = 8, corType = "pearson," TOMType = "signed," networkType = "signed,"  
196 maxBlockSize = 12795, minModuleSize = 30, mergeCutHeight = 0.25, and pamRespectsDendro  
197 = FALSE; all other parameters were set to default. Constructed co-expression modules were  
198 assigned a color by the WGCNA R package, with any gene not assembling into a specific



199 module placed in the “grey” module. Module-trait associations were identified with Pearson  
200 correlation between module eigengene (ME; first principal component of the co-expression  
201 matrix [38] and clinical and hematology data). Modules were considered weakly or strongly  
202 correlated with each trait having a p-value  $\leq 0.10$  and  $|R| \geq 0.3$  or p-value  $\leq 0.05$  and  $|R| > 0.4$ ,  
203 respectively. Color scaling was performed with the Bioconductor package *viridis* v0.6.1 [39] to  
204 allow ease of visual interpretation for individuals with color blindness.

205

## 206 Cross-population module preservation analysis

207         Based on our previous work, it can be inferred that host gene expression captured at  
208 facility arrival is variable across BRD severity cohorts [20,40,41]. Therefore, we assessed  
209 whether the at-arrival co-expression patterns and modules found in this study were well  
210 preserved across an RNA-Seq data set from an independent population of cattle. We investigated  
211 cross-population module preservation across the whole blood transcriptomes of cattle  
212 previously assessed for differential gene expression (GSE161396; 2019 population ( $n=24$ )) with  
213 the *modulePreservation* function found within the WGCNA R package. The gene-level raw  
214 count matrix from previous analysis [20] was utilized and processed, filtered, and normalized in  
215 identical procedures as the 2017 RNA-Seq data set (see RNA-Seq data processing and  
216 normalization section); a total of 12,803 genes were identified in the 2019 data set after count  
217 processing and normalization. Permutation testing ( $n=200$  permutations) was conducted to assess  
218 the significance of module preservation across the 2017 and 2019 RNA-Seq data sets, utilizing  
219 the two composite statistical measurements *Zsummary* and *medianRank* scores [36,42]. Briefly,  
220 the identified modules within the test network are randomly permuted  $n$  times, where, for each  
221 permuted index, the mean and standard deviation is calculated for defining the corresponding *Z*  
222 statistic [42,43]. Through the combination of additional preservation statistics (average of  
223 *Zdensity* and *Zconnectivity*), the calculated *Zsummary* statistic determines the level of mean  
224 connectivity among all genes within a module (i.e., network density) across the two data sets  
225 [24,42]. Higher *Zsummary* values indicate a stronger level of module preservation between data  
226 sets but is dependent on the number of genes within the module (i.e., module size) [42]. To  
227 further evaluate preservation in a module size-independent manner, *medianRank* scores are  
228 calculated from the mean connectivity and density measurements observed from each module



229 and assigned a rank score [42]. Lower medianRank values indicate a stronger level of module  
230 preservation between data sets. For this study, any module possessing  $Z_{summary} \geq 10$  and  
231 medianRank  $\leq 5$  was considered highly preserved.

232

233 Functional enrichment analysis of preserved modules

234 WebGestalt 2019 [44] (WEB-based Gene SeT AnaLysis Toolkit; accessed September 13,  
235 2021) was utilized for over-representation analysis to identify enriched Gene Ontology (GO)  
236 biological processes, cellular components, molecular functions, and pathways from genes found  
237 in each module considered well preserved. Pathway enrichment analysis was performed with the  
238 pathway database Reactome [45]. Human (*Homo sapiens*) gene orthologs and functional  
239 databases were utilized for GO term and pathway enrichment analyses. Over-representation  
240 analysis parameters within WebGestalt 2019 included between 3 and 3000 genes per category,  
241 Benjamini-Hochberg (BH) procedure for multiple hypothesis correction, adjusted p-value (FDR)  
242 cutoff of 0.05 for significance, and a total of 10 expected reduced sets of the weighted set cover  
243 algorithm for redundancy reduction.

244

245 BRD-associated hub gene identification and network analyses

246 Hub genes are those genes found within a module (eigengenes) that possess high  
247 connectivity which may exhibit a greater degree of biological significance in respect to  
248 significantly associated clinical traits, when compared to all other eigengenes [38,46,47]. Here,  
249 we sought to identify hub genes found from modules which are significantly associated with any  
250 of the clinical BRD categories (BRD, Treat\_Freq, and Risk\_Days). This was performed in the  
251 WGCNA R package with two procedures. First, Pearson correlation between gene expression  
252 and module eigengenes was calculated, resulting in the level of module membership ( $k_{ME}$ ) for  
253 each gene. Second, the Pearson correlation between individual gene expression level and clinical  
254 trait was calculated, resulting in the level of gene significance (GS) for each gene. Any gene  
255 possessing  $k_{ME}$  and GS values  $\geq 0.7$  and  $\geq 0.3$ , respectively, were considered hub genes for  
256 clinical traits [36]. All BRD-associated hub genes were used for network construction of known  
257 and predicted protein-protein interactions with the Search Tool for the Retrieval of Interacting

258 Genes (STRING) database v11.5 [48], utilizing bovine (*Bos taurus*) annotations. STRING  
259 analysis was performed with the physical subnetwork setting, where edges only display protein  
260 interactions that have evidence of binding to or forming a physical complex. Any interaction  
261 above a combined score (confidence) of 0.200 was incorporated into the complete network prior  
262 to network clustering; disconnected nodes were removed from the network. The Markov Cluster  
263 (MCL) algorithm was utilized for network clustering due to its superior performance in complex  
264 extraction without the need of additional parameter tuning [49]. Hub genes within the interaction  
265 network were placed into distinct clusters based on MCL clustering of the distance matrix  
266 acquired from the combined interaction scores, using a MCL inflation parameter of 1.4.

267

268 Statistical analysis

269 Clinical and hematology data (described in animal enrollment and hematology analysis)  
270 were compared between cattle treated for naturally-acquired clinical BRD within the first 28  
271 days following facility arrival (BRD) and those never being diagnosed nor treated (Healthy).  
272 Residual normality was assessed in R v4.0.4 with the Shapiro-Wilk test [50], with an *a priori*  
273 level of significance set at 0.10; neutrophil percentage (Neu%), eosinophil percentage (Eos%),  
274 basophil percentage (Baso%), lymphocyte percentage (Lymph%), neutrophil-to-lymphocyte  
275 ratio (NL ratio), FEC-d0, MCHC, RDW, and Sex were considered non-normally distributed.  
276 Differences in normally distributed variables between BRD and Healthy cattle were assessed  
277 with the Student's *t*-test. Differences in non-normally distributed variables were assessed with  
278 the Welch's *t*-test; differences between the two groups with respect to Sex was assessed with  
279 Pearson's chi-square test with Yates' continuity correction. Differences between BRD and  
280 Healthy cattle were considered significant having a p-value  $\leq 0.05$ .

281

## 282 Results

283 Statistical analysis of clinical and hematological parameters

284 Descriptive statistics for the clinical and hematological data are provided in Table 1.  
285 Regarding the hematological parameters, average values of Lymph%, RDW, and PLT were

286 outside of the internal reference intervals for both BRD and Healthy cattle. In this study, RBC  
287 was considered significantly higher at arrival in BRD cattle compared to Healthy cattle; no other  
288 parameter was considered significantly different between the two groups. Regarding clinical  
289 data, BRD cattle possessed significantly lower weight gain by end of study (ADG-d82; 2.273  
290 lbs/day in BRD and 2.946 lbs/day in Healthy) and lower calculated slopes of weight gain over  
291 time (Growth Rate; 2.370 in BRD and 2.995 in Healthy); no other clinical parameter was  
292 considered significantly different between the two groups.

293

294 **Table 1. Statistical analysis of hematological and clinical traits between BRD and Healthy**  
295 **groups.**

| <b>Variable</b>  | <b>Internal Reference</b> | <b>BRD mean (s.d.)</b> | <b>Healthy mean (s.d.)</b> | <b>p-value</b> |
|------------------|---------------------------|------------------------|----------------------------|----------------|
| Neu%             | 37.000 – 80.000           | 35.917 (5.547)         | 37.213 (9.748)             | 0.717          |
| Eos%             | 0.000 – 12.000            | 3.944 (3.237)          | 2.635 (1.616)              | 0.251          |
| Baso%            | 0.000 – 2.500             | 0.193 (0.213)          | 0.151 (0.218)              | 0.658          |
| Mono%            | 0.000 – 12.000            | 8.862 (4.603)          | 8.363 (4.507)              | 0.805          |
| Lymph%           | 10.000 – 50.000           | 51.083 (4.756)         | 51.635 (11.928)            | 0.893          |
| NL Ratio         | N/A                       | 0.711 (0.141)          | 0.859 (0.660)              | 0.504          |
| WBC (K/ $\mu$ L) | 4.000 – 12.000            | 7.430 (2.722)          | 7.320 (1.292)              | 0.913          |
| RBC (M/ $\mu$ L) | 5.000 – 9.990             | 9.605 (0.568)          | 9.032 (0.676)              | 0.047          |
| HGB (g/dL)       | 7.700 – 15.000            | 13.075 (1.071)         | 12.491 (0.906)             | 0.194          |
| HCT (%)          | 25.000 – 45.000           | 36.125 (3.269)         | 35.000 (2.534)             | 0.391          |
| MCV (fL)         | 36.000 – 55.000           | 37.725 (3.843)         | 38.845 (2.851)             | 0.460          |
| MCH (pg)         | 12.000 – 22.000           | 13.625 (1.112)         | 13.855 (0.806)             | 0.597          |
| MCHC (g/dL)      | 32.000 – 40.000           | 36.225 (1.190)         | 35.691 (0.977)             | 0.272          |
| RDW (%)          | 11.600 – 14.800           | 29.258 (2.362)         | 27.564 (3.023)             | 0.171          |
| PLT (K/ $\mu$ L) | 200.000 – 900.000         | 1413.083 (506.885)     | 1149.000 (401.516)         | 0.203          |
| FEC-d0           | N/A                       | 761.250 (768.795)      | 618.364 (408.492)          | 0.597          |

|              |     |                    |                   |       |
|--------------|-----|--------------------|-------------------|-------|
| ADG-d12      | N/A | 0.667 (1.604)      | 2.167 (1.838)     | 0.059 |
| ADG-d26      | N/A | 1.917 (1.204)      | 2.710 (0.948)     | 0.110 |
| ADG-d82      | N/A | 2.273 (0.599)      | 2.946 (0.432)     | 0.008 |
| Growth Rate  | N/A | 2.370 (0.554)      | 2.995 (0.435)     | 0.009 |
| Temp-d0 (F°) | N/A | 103.333 (0.712)    | 103.291 (0.667)   | 0.890 |
| Sex          | N/A | 10 bulls, 2 steers | 10 bulls, 1 steer | 1.000 |

296 Means, standard deviations (in parentheses), and statistical probability values of differences in  
297 hematological and clinical parameters between BRD (n=12) and Healthy (n=11) cattle.  
298 Parameters were considered significantly different with p-values  $\leq 0.05$ .

299

### 300 Weighted gene co-expression network construction

301 The remaining filtered genes (n=12,795) were used for WGCNA network and module  
302 construction. The resulting network identified a total of 41 color-coded modules of co-expressed  
303 genes, excluding the grey module which incorporates uncorrelated genes (n=1,235) (Figure 1).  
304 Across the 41 assigned modules, the turquoise module possessed the largest number of co-  
305 expressed genes (n=2,503) and the lightsteelblue1 module possessed the smallest number of co-  
306 expressed genes (n=38); the average size of each module was approximately 282 genes. The  
307 complete list of genes and module assignment is found in Supplemental Table S3.

308

309 **Figure 1. Cluster dendrogram of 12,795 genes generated through dissimilarity metrics (1-  
310 TOM) and hierarchical clustering.**

311

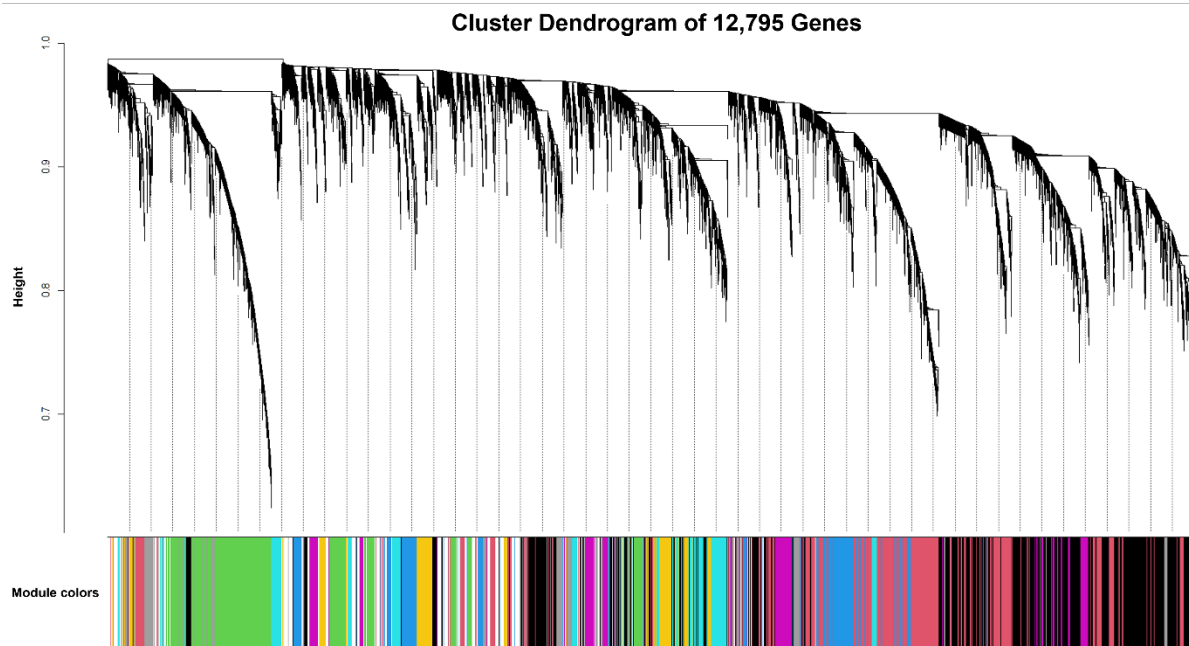

312

313 Automated block-wise module detection of interconnected genes were grouped into 41 unique  
314 color-coded modules, excluding the grey module (uncorrelated genes). The x-axis corresponds to  
315 the gene-module assignment and the y-axis (Height) depicts the calculated distance between co-  
316 expressed genes from hierarchical average linkage clustering.

317

318 Module-trait relationship with hematological and clinical datasets

319 Pearson correlation heatmaps were generated to assess the relationship between all  
320 modules and hematological clinical datasets. Regarding hematological data, several significant  
321 relationships of interest exist (Figure 2). The tan module possessed the highest number of  
322 significant correlations with the hematological data (8), followed by turquoise, pink, lightgreen,  
323 and lightcyan modules (7). With respect to RBC, considered significantly higher at arrival in  
324 BRD cattle compared to Healthy cattle, six modules were strongly correlated: paleturquoise ( $R =$   
325  $0.44, p = 0.03$ ), lightcyan ( $R = 0.51, p = 0.01$ ), green ( $R = 0.41, p = 0.05$ ), steelblue ( $R = 0.50, p$   
326  $= 0.01$ ), brown ( $R = -0.45, p = 0.03$ ), turquoise ( $R = 0.49, p = 0.02$ ). Additionally, seven modules  
327 were considered weakly correlated with RBC: magenta ( $R = 0.32, p = 0.10$ ), darkgreen ( $R =$   
328  $0.36, p = 0.09$ ), lightsteelblue1 ( $R = -0.36, p = 0.09$ ), blue ( $R = 0.36, p = 0.10$ ), saddlebrown ( $R =$

329 0.36,  $p = 0.09$ ), orangered4 ( $R = -0.33$ ,  $p = 0.10$ ), tan ( $R = -0.36$ ,  $p = 0.09$ ). Regarding modules  
330 correlating with RBC, three modules possessed significant associations with multiple related red  
331 cell indices (HGB, HCT, MCV, MCH, MCHC, and RDW): saddlebrown, steelblue, and  
332 lightcyan. Saddlebrown was strongly associated with MCV ( $R = -0.63$ ,  $p = 0.001$ ) and MCH ( $R =$   
333  $-0.62$ ,  $p = 0.001$ ), and weakly associated with HCT ( $R = -0.31$ ,  $p = 0.10$ ) and MCHC ( $R = 0.36$ ,  $p$   
334  $= 0.10$ ). Steelblue was strongly associated with RDW ( $R = 0.70$ ,  $p = 2e-04$ ) and weakly  
335 associated with HGB ( $R = 0.35$ ,  $p = 0.10$ ) and MCHC ( $R = 0.40$ ,  $p = 0.06$ ). Lightcyan was  
336 strongly associated with HGB ( $R = 0.47$ ,  $p = 0.02$ ) and RDW ( $R = 0.51$ ,  $p = 0.01$ ) and weakly  
337 associated with HCT ( $R = 0.38$ ,  $p = 0.08$ ).

338

339 **Figure 2. Module-trait relationships between co-expression modules and hematological**  
340 **traits.**

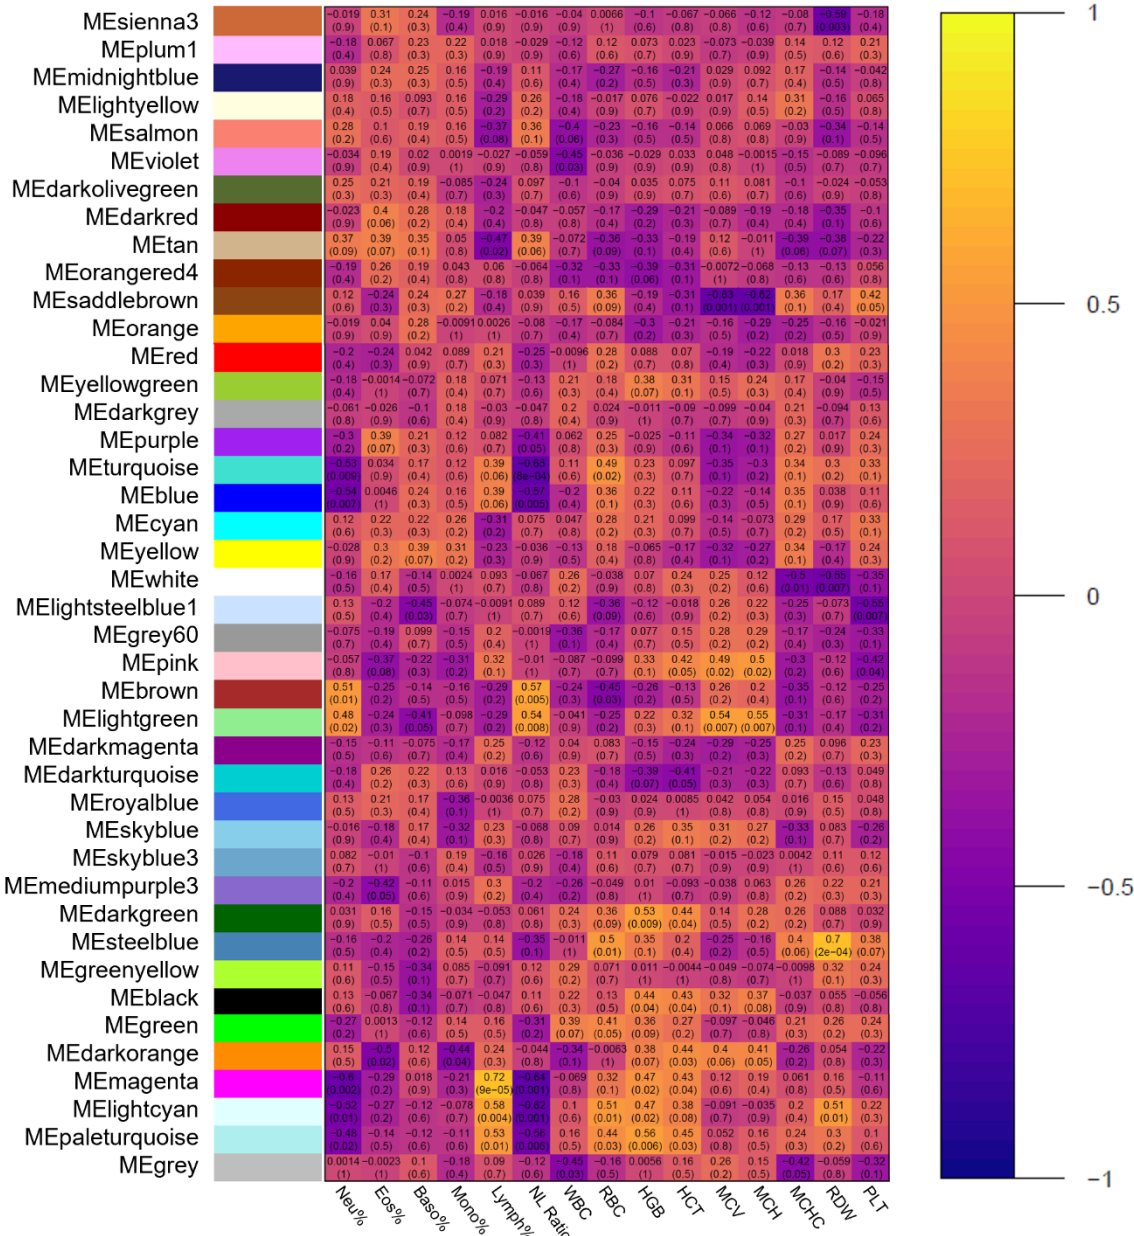

341

342 Pearson correlations between each of the unique color-coordinated modules and hematological  
 343 traits are visualized and represented as a heatmap. Each row represents a distinct co-expression  
 344 module, and each column represents hematological traits as follows: white blood cells (WBC;  
 345 K/ $\mu$ L), erythrocytes (RBC; M/ $\mu$ L), hemoglobin (HGB; g/dL), hematocrit (HCT; %), mean  
 346 corpuscular volume (MCV; fL), mean corpuscular hemoglobin (MCH; pg), mean corpuscular  
 347 hemoglobin concentration (MCHC; g/dL), red blood cell distribution width (RDW; %), and



348 platelets (PLT; K/ $\mu$ L). Cells are represented by how positive (yellow/white) or negative  
349 (purple/black) the correlation is between module and hematological trait, respectively.

350 The relationships between modules and clinical data are found in Figure 3. With respect  
351 to all clinical disease associations (BRD, Treat\_Freq, and Risk\_Days), five modules possessed  
352 significant correlations: steelblue, mediumpurple3, royalblue, orange, and violet. Steelblue was  
353 strongly associated with BRD ( $R = 0.41$ ,  $p = 0.05$ ) and Risk\_Days ( $R = -0.41$ ,  $p = 0.05$ ).  
354 Mediumpurple3 was weakly associated with Treat\_Freq ( $R = -0.40$ ,  $p = 0.06$ ). Royalblue was  
355 weakly associated with Treat\_Freq ( $R = -0.40$ ,  $p = 0.06$ ). Orange was weakly associated with  
356 BRD ( $R = -0.39$ ,  $p = 0.07$ ), Treat\_Freq ( $R = -0.34$ ,  $p = 0.10$ ), and Risk\_Days ( $R = 0.38$ ,  $p = 0.07$ ).  
357 Violet was weakly associated with Treat\_Freq ( $R = -0.38$ ,  $p = 0.07$ ). Regarding production traits  
358 (ADG-d12, ADG-d26, ADG-d82, and GR), ten modules possessed significant correlations:  
359 darkgreen, skyblue, darkturquoise, darkmagenta, purple, yellowgreen, orange, orangered4,  
360 darkred, and lightyellow. However, to mitigate unexplained variation which may confound  
361 differences in ADG-d12 and ADG-d26, coupled with the lack of significance between disease  
362 cohorts, eight modules correlating with ADG-d82 and GR were prioritized. Darkred was strongly  
363 associated with ADG-d82 ( $R = 0.50$ ,  $p = 0.02$ ) and GR ( $R = 0.50$ ,  $p = 0.02$ ). Orangered4 was  
364 strongly associated with ADG-d82 ( $R = 0.41$ ,  $p = 0.05$ ) and weakly associated with GR ( $R =$   
365  $0.38$ ,  $p = 0.07$ ). Orange was strongly associated with ADG-d82 ( $R = 0.43$ ,  $p = 0.04$ ) and GR ( $R =$   
366  $0.41$ ,  $p = 0.05$ ). Yellowgreen was strongly associated with ADG-d82 ( $R = 0.41$ ,  $p = 0.05$ ) and  
367 GR ( $R = 0.42$ ,  $p = 0.05$ ). Purple was weakly associated with GR ( $R = 0.32$ ,  $p = 0.10$ ).  
368 Darkmagenta was weakly associated with ADG-d82 ( $R = -0.34$ ,  $p = 0.10$ ). Skyblue was weakly  
369 associated with GR ( $R = -0.36$ ,  $p = 0.10$ ). Darkgreen was weakly associated with ADG-d82 ( $R =$   
370  $-0.32$ ,  $p = 0.10$ ). Notably, orange was the only module which possessed significant correlations  
371 with both disease-associated and weight gain traits. However, orange did not possess any  
372 significant correlations with hematological traits.

373

374 **Figure 3. Module-trait relationships between co-expression modules and clinical traits.**

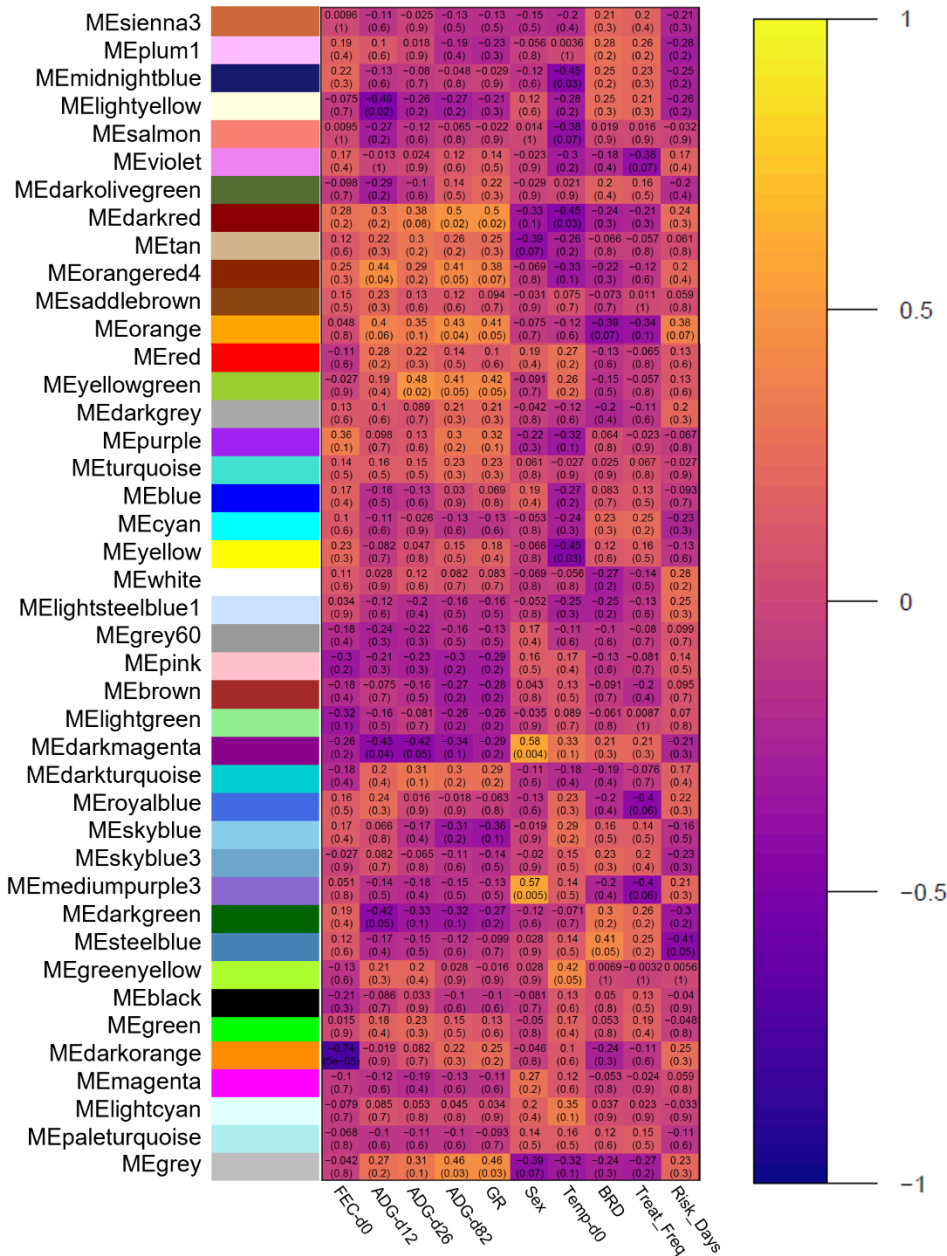

375

376 Pearson correlations between each of the unique color-coordinated modules and clinical traits are  
 377 visualized and represented as a heatmap. Each row represents a distinct co-expression module,  
 378 and each column represents clinical traits as follows: at-arrival fecal egg counts per gram  
 379 modified-Wisconsin procedure (FEC-d0), body weight in pounds (WT) at arrival, Day 12, Day  
 380 26, and Day 82, calculated average daily weight gain at each time point (ADG), growth rate  
 381 (slope of weight over days recorded; GR), at-arrival castration status (Sex), at-arrival rectal

382 temperature (Temp-d0), development of clinical BRD within 28 days post-arrival (BRD),  
383 number of clinical BRD treatments (Treat\_Freq), and timing to first BRD treatment (Risk\_Days).  
384 Cells are represented by how positive (yellow/white) or negative (purple/black) the correlation is  
385 between module and clinical trait, respectively.

386

387 Cross-populational network preservation analysis

388 Module preservation analysis identified five modules considered well preserved across  
389 the 2017 and 2019 populations: black (size = 432; Zsummary = 39.772; medianRank = 4), purple  
390 (size = 296; Zsummary = 34.773; medianRank = 2), lightgreen (size = 123; Zsummary = 23.291;  
391 medianRank = 1), tan (size = 222; Zsummary = 17.559; medianRank = 5), and steelblue (size =  
392 59; Zsummary = 11.555; medianRank = 3) (Figure 4). Notably, steelblue was the only well-  
393 preserved module which possessed significant association with BRD-related clinical traits.

394 **Figure 4. Cross-populational module preservation analysis.**

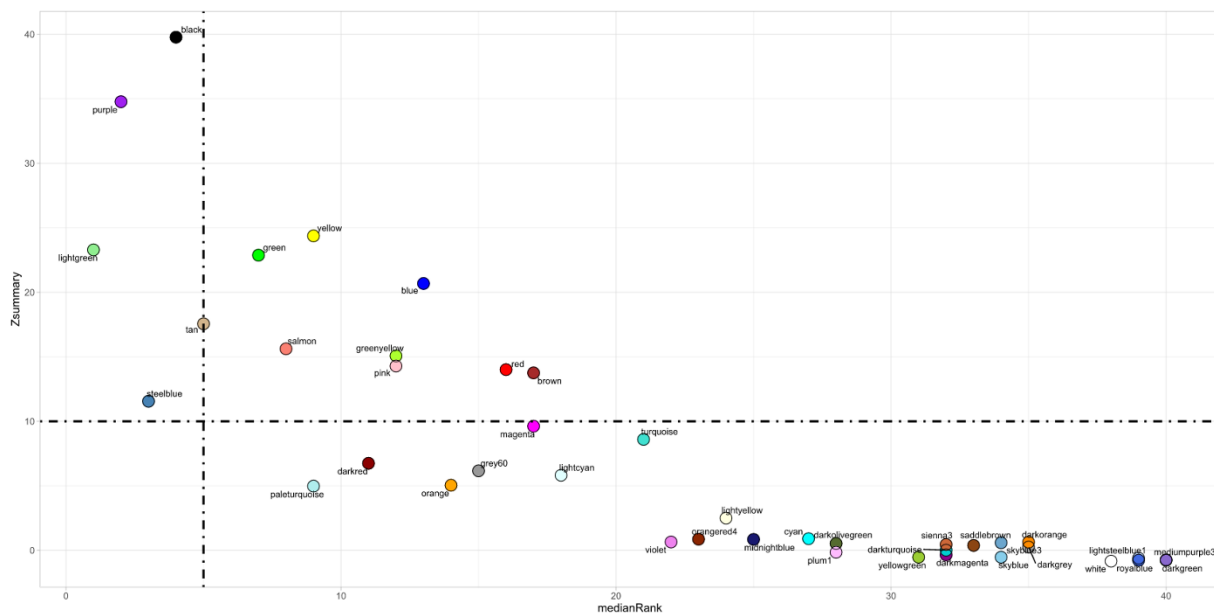

395

396 The medianRank and Zsummary values across all modules are depicted through the scatterplot  
397 x- and y-axes, respectively. Zsummary values  $\geq 10.0$  and medianRank values  $\leq 5.0$ , indicated by  
398 dashed lines, denote that a module identified with the 2017 gene expression data is well  
399 preserved across the 2019 gene expression data.

400

#### 401 Functional enrichment analysis of well-preserved modules

402 To explore the functionality and biological relevance of the five well preserved modules,  
403 we performed over-representation analysis with all genes from each module (black, purple,  
404 lightgreen, tan, and steelblue; Supplemental Table S4). Analysis of genes from the black module  
405 revealed 47 biological process terms, 49 cellular component terms, 17 molecular function terms,  
406 and five significantly enriched pathways. Biological processes identified from genes within the  
407 black module were related to neutrophil activity and degranulation, aldehyde metabolism,  
408 nitrogen compound response and catabolism, and cellular transport. Cellular components  
409 identified from genes within the black module involved intracellular and extracellular vesicles,  
410 secretory granules, cellular junctions, and lysosomes. Molecular functions identified from genes  
411 within the black module involve cytokine, enzyme, and calcium-dependent protein binding,  
412 aldehyde dehydrogenase (NAD) activity, and interleukin-1 receptor activity. Enriched pathways  
413 identified from genes within the black module involved neutrophil degranulation, metabolic  
414 disease, and signaling via tyrosine kinase receptor.

415 Analysis of genes from the purple module revealed 54 biological process terms, 46  
416 cellular component terms, 16 molecular function terms, and 40 significantly enriched pathways.  
417 Biological processes identified from genes within the purple module involved mitochondrial  
418 processes (cristae formation, respiratory chain complex assembly), non-coding RNA processing  
419 and maturation, cellular protein transport, and metabolic processes and biosynthesis. Cellular  
420 components identified from genes within the purple module involved cell substrate and adhesion  
421 junction, ribosomes, cytoplasmic side of endoplasmic reticulum, mitochondrial inner membrane  
422 and envelope, and the 48S preinitiation complex. Molecular functions identified from genes  
423 within the purple module involved mRNA/rRNA binding, ubiquitin ligase inhibition, ATP  
424 synthase activity, and NADH dehydrogenase. Enriched pathways identified from genes within  
425 the purple module involved infectious disease/viral infection, amino acid metabolism, translation  
426 initiation/termination, rRNA processing, and ATP synthesis and respiratory electron transport.

427 Analysis of genes from the lightgreen module revealed 38 biological process terms, 49  
428 cellular component terms, three molecular function terms, and one significantly enriched  
429 pathway. Biological processes identified from genes within the lightgreen module involved

430 leukocyte/neutrophil differentiation, activation, and degranulation, tissue remodeling, cell  
431 secretion and exocytosis, phagocytosis and micropinocytosis, dendritic cell activation, and  
432 interleukin-8 secretion. Cellular components identified from genes within the lightgreen module  
433 involved lysosome, secretory/azurophil granule, vesicular/vacuolar membrane, granule lumen,  
434 and macropinosome. Molecular functions identified from genes within the lightgreen module  
435 involved symporter activity, potassium-chloride symporter activity, and phosphatidylinositol  
436 binding. The single enriched pathway identified from genes within the lightgreen module was  
437 neutrophil degranulation.

438         Analysis of genes from the tan module revealed 35 biological process terms, 32 cellular  
439 component terms, four molecular function terms, and two significantly enriched pathways.  
440 Biological processes identified from genes within the tan module involved B-cell activation,  
441 receptor signaling, and regulation, immunoglobulin production, cytokine production, positive  
442 regulation of interferon-gamma production, and mononuclear cell proliferation. Cellular  
443 components identified from genes within the tan module involved MHC class II protein  
444 complex, lytic vacuole membrane, clathrin-coated endocytic vesicle, endosomal membrane, and  
445 B-cell receptor complex. Molecular functions identified from genes within the tan module  
446 involved MHC class II receptor activity, MHC class II protein complex binding, and peptide  
447 antigen binding. Enriched pathways identified from genes within the tan module were antigen  
448 activates B-cell receptor (BCR) leading to generation of second messengers and CD22-mediated  
449 BCR regulation.

450         Analysis of genes from the steelblue module revealed three biological process terms,  
451 three cellular component terms, no molecular function terms, and no significantly enriched  
452 pathways. Biological processes identified from genes within the steelblue module were cell  
453 surface receptor signaling pathway, negative regulation of fibroblast growth factor receptor  
454 signaling pathway, and antigen receptor-mediated signaling pathway. Cellular components  
455 identified from genes within the steelblue module involved side of membrane, plasma membrane  
456 part, and alpha-beta T cell receptor complex.

457

458 BRD-associated hub gene identification and *in silico* protein-protein interaction and clustering  
459 analyses

460 Hub gene identification analysis included co-expressed genes from the following  
 461 modules: violet (54), orange (68), royalblue (100), mediumpurple3 (41), and steelblue (59). The  
 462  $k_{ME}$  and GS value cutoffs within each module resulted in 24, 46, 30, 22, and 32 BRD-associated  
 463 hub genes from the violet, orange, royalblue, mediumpurple3, and steelblue modules,  
 464 respectively (Supplemental Table S5). These resulting hub genes were further utilized for  
 465 physical subnetwork protein-protein interactions and network clustering. After removal of all  
 466 disconnected nodes, the interaction network demonstrated significant connectivity between 52  
 467 proteins across 11 distinct clusters with high inter-nodal connectivity (Figure 5); these gene  
 468 products and their combined interaction scores are found in Supplemental Table S6. These  
 469 connected gene products demonstrate possible at-arrival biomolecular complexes associated with  
 470 BRD development and severity.

471

472 **Figure 5. Protein-protein interaction network of interconnected BRD-associated hub genes.**

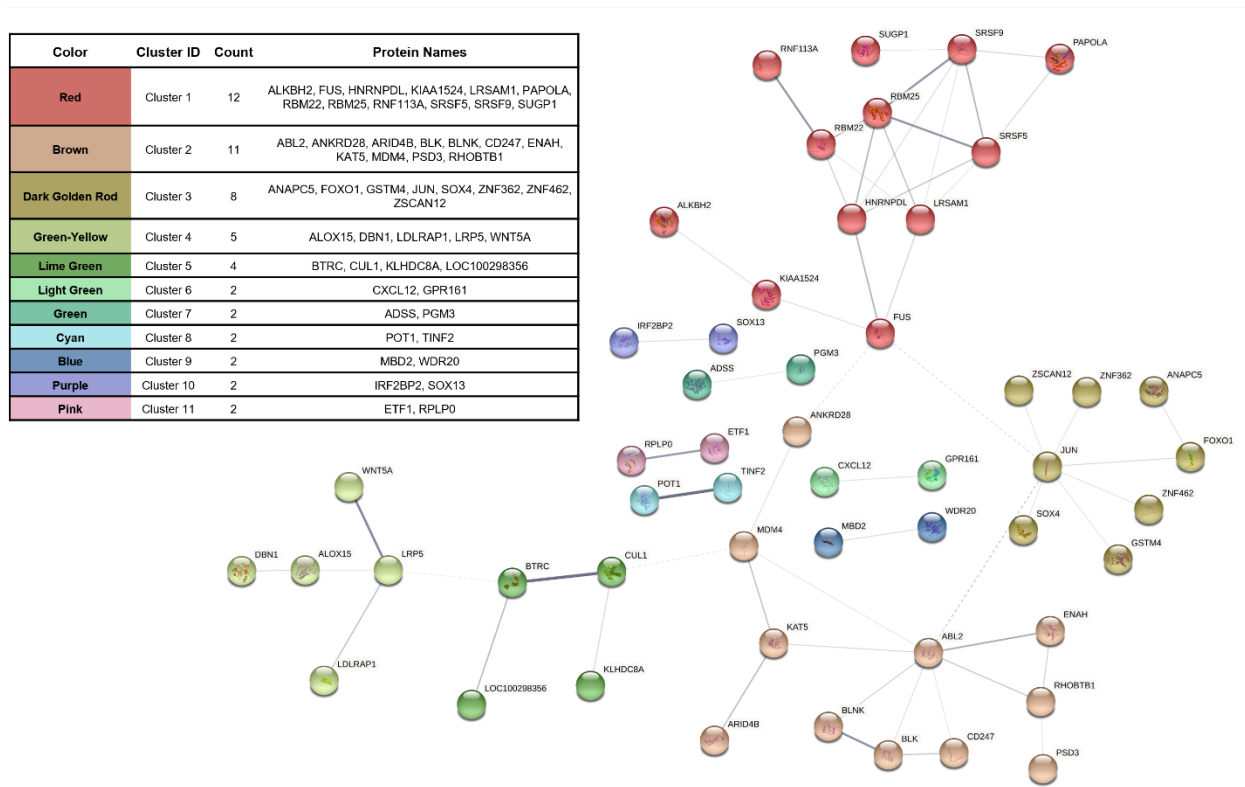

473



474 Interaction score analysis reveals 52 genes, with high intramodular and BRD-trait relationship,  
475 which possess high connectivity. Interconnected gene products (nodes) were further grouped into  
476 distinct clusters based on their interaction scores (edges). Edge thickness represents the level of  
477 interaction confidence between nodes.

478

## 479 Discussion

480 While at-arrival management practices are somewhat dependent upon anticipated risk of  
481 BRD development, both inter- and intra-herd level disease prevalence is highly variable [5,51].  
482 To counter this variability, beef production systems will often administer antimicrobials and/or  
483 immunostimulants at arrival to reduce the risk of clinical BRD development and associated  
484 production losses [52,53]. However, immunostimulant administration alone as a metaphylactic  
485 protocol for controlling BRD appears to have minimal impact on rates of morbidity [54,55,56].  
486 Metaphylactic use of antimicrobials at arrival reduces risk of morbidity and mortality across beef  
487 production systems, however this management practice is variable in efficacy, in both rates of  
488 disease across cattle populations and in pharmacological choice, and the practice is suspected to  
489 drive expansion of antimicrobial resistance, a growing societal concern [52,57,58]. Given this  
490 background, our research group and others have focused on evaluating host transcriptomes at  
491 arrival, to better characterize host-driven mechanisms and develop candidate mRNA biomarkers  
492 associated with clinical BRD outcomes [18,19,20]. These studies have provided valuable  
493 information regarding cattle treated based on clinical signs of BRD, but these studies heavily rely  
494 on semi-objective evaluation of BRD cases and may miss underlying subclinical or  
495 misdiagnosed disease. As such, the underlying host mechanisms involved in BRD development  
496 remain disputed. Therefore, to identify at facility arrival genes and mechanisms which may  
497 represent the variable development of BRD cases and leverage the total expression profile of  
498 individual cattle, we employed a systems biology approach with weighted co-expression network  
499 analysis. This methodology allows us to identify networks of genes exclusively co-expressed,  
500 and to evaluate said networks in a reduced manner in order to identify molecules and  
501 mechanisms of interest for future BRD prediction studies. Importantly, co-expression network  
502 analysis serves as a complementary, yet distinct, approach to identifying genes and mechanisms  
503 associated with disease status, when compared to differential expression analyses. The network



504 approach performed in this study evaluates and identifies genes that are strongly coordinated in  
505 terms of expression, and determines correlation with overlapping metadata (clinical data),  
506 whereas differential expression analyses typically follow a pairwise approach to determine level  
507 of effect and probability of gene differences between groups. Co-expression network analyses  
508 consider greater biological context when evaluating gene expression differences, compared to  
509 more traditional pairwise approaches. Additionally, through utilization of hematological  
510 parameters, we could capture changes in the cellular composition of whole blood as they may  
511 relate to cellular and gross pathophysiology across individuals.

512         While we recognize that dynamic changes captured in whole blood may not completely  
513 encompass biomolecular characteristics seen within lung tissue, whole blood serves as a practical  
514 and easily obtainable sample for respiratory and inflammatory disease diagnostics [59,60]. After  
515 initial statistical assessment of CBC data, we identified that both BRD and Healthy cattle  
516 possessed comparable lymphocytosis, thrombocytosis, and erythrocytic macrocytosis; the  
517 distribution of these values were not considered significantly different between the two groups.  
518 Notably, mild to moderate levels of dehydration, a common condition in newly arrived post-  
519 weaned beef animals, may cause elevated changes in hematocrit levels and lymphocytes [61,62].  
520 Lymphocytosis and thrombocytosis may also result from host responses to infection or  
521 inflammation. Additionally, reticulocytosis (i.e., immature erythrocytosis) is the most common  
522 cause of erythrocytic macrocytosis [61] and was noted as a common feature found across all  
523 blood samples submitted for analysis. While these cattle did not possess physiological nor  
524 hematological evidence of hemolysis or blood loss upon facility arrival, this finding may be  
525 associated with early regenerative anemia, systemic inflammation, or mineral deficiencies  
526 [61,62,63]. Furthermore, blood-borne pathogens were not reported from blood smear assessment.  
527 Nevertheless, it does not rule out the possibility of mild/subclinical intraerythrocytic pathology  
528 or asymptomatic convalescence that may result in these increased hematological changes. Such  
529 pathology is often caused by parasitic diseases such as anaplasmosis, a common infectious  
530 disease of cattle across the United States [64,65]. It is plausible that these findings indicate that  
531 cattle at facility entry are undergoing similar physiological changes as it relates to stressful  
532 and/or pathogenic events (long-distance transportation, co-mingling, etc.) and underlying  
533 genomic mechanisms serve to resolve or prolong deleterious physiological conditions that result  
534 in BRD.

535           With respect to distributions, we identified that RBCs were significantly increased in  
536 cattle that would go on to develop BRD versus those that did not. Although this result was  
537 identified in a relatively small number of cattle, it corresponds with the work of Richeson and  
538 colleagues [16]. As discussed within their prior research, elevated RBCs may indicate  
539 dehydration and subsequent predisposition with BRD development [5,16]. Interestingly, we were  
540 able to identify one well-preserved co-expression module which possessed significant  
541 correlations with RBCs, RDW, PLT, BRD, and Risk\_Days (i.e., shorter time to first treatment):  
542 steelblue. Upon further investigation, we discovered that the genes within this module were  
543 related to antigen receptor-mediated signaling (*BLK*, *CD247*, *CD276*, *CD3G*, *GATA3*, and  
544 *PLEKHA1*) and negative regulation of fibroblast growth factor receptor signaling (*CREB3L1*,  
545 *GATA3*, and *WNT5A*), and specifically components of alpha-beta T-cell receptor complexes  
546 (*CD247* and *CD3G*). The upregulation of IL-7R and associated signaling molecules, which  
547 include *CD3G* and *CD247*, initiate NOTCH-dependent proliferation of T-cell precursors [66].  
548 Furthermore, elevated levels of *BLK* and *GATA3* tend to skew the immune response towards  
549 Th2-type immunity [67,68,69]. In terms of RBC relationship, previous research has  
550 demonstrated that Th2-stimulated bone marrow T-cells promote erythroid differentiation and  
551 lead to the development of erythroblasts [70]. Additionally, *CXCL12*, also identified within the  
552 steelblue module and previously identified as a differentially expressed gene associated with  
553 BRD development [20], is involved in Th2-cell migration and immune response [70,71].  
554 *HNRNPH3*, found within the steelblue module, has previously been identified as a key  
555 transcription factor associated with clinical BRD [18]. Lastly, several genes identified in the  
556 steelblue module were also found in the “turquoise” module identified by Hasankhani and  
557 colleagues [24], which enriched positive regulation of activated T-cell proliferation and  
558 Th1/Th2-cell differentiation pathways. While this study cannot elucidate the exact mechanistic  
559 components nor temporality of molecular events, it suggests that promotion of Th2-mediated T-  
560 cells at arrival shares a common mechanism with RBC elevation and risk of BRD development.  
561 Our previous research has indicated that genes elevated at arrival in cattle that eventually  
562 develop BRD interact, and may enhance, TLR-4 and IL-6 responses [20,40,72], which may  
563 contribute to the co-expressed pattern related to Th2-mediated T-cell development [73]. Overall,  
564 this pattern of Th2-mediated immunity is strongly associated with clinical BRD development and

565 timing to first treatment, and may further strengthen the depiction that early Th2 responses  
566 indicate clinical disease development and lung pathology [74,75].

567 While steelblue was the only well-preserved BRD-associated module detected, four other  
568 modules were determined to be well-preserved across populations and warranted specific  
569 functional enrichment investigation: black, purple, lightgreen, and tan. Genes within the black  
570 module, largely involved with neutrophil activation and degranulation, IL-1 activity, and  
571 metabolic disease, was only significantly associated with hemoglobin and erythrocyte parameters  
572 (HGB, HCT, MCV, and MCH); notably, the black module did not possess any significant  
573 associations with clinical variables. This may indicate that neutrophilic and IL-1 activity was not  
574 indicative of BRD within this population of cattle, and/or additional disease-associated variables  
575 were not recorded in this study. Genes within the purple module, associated with increased  
576 eosinophil percentage, decreased neutrophil-lymphocyte ratio, decreased MCV and MCH,  
577 increased at-arrival fecal parasitic egg count, and increased growth rate (weight gain over 82  
578 days), largely enriched for mitochondrial function and aerobic metabolism and RNA processing.  
579 Importantly, this module possessed positive association to weight gain independent of BRD  
580 development. Previous research has investigated many of these ribosomal protein-encoding  
581 genes for their potential for immune effector capacity [76] and cell regulation [77], however this  
582 marks the first time, to our knowledge, that they have been implicated in contributing to weight  
583 gain potential in high-risk cattle. Notably, one gene (*RPS26*) has been previously identified as a  
584 differentially decreased marker in the diseased lungs of cattle experimentally challenged with  
585 BRD-associated pathogens [78,79]. Similar to the black module, genes identified within the  
586 lightgreen module were associated with hemoglobin and erythrocyte parameters, but additionally  
587 positively correlated with neutrophil percentage and neutrophil-lymphocyte ratio, and negatively  
588 correlated with basophil percentage; likewise, the lightgreen module did not possess significant  
589 associations with clinical variables. Lastly, the tan module, possessing several significant  
590 hematological associations, and was negatively correlated with castration status at arrival,  
591 possessed genes which enriched for B-cell receptor complexes and regulation and interferon-  
592 gamma production. Unfortunately, the underlying physiological impact of co-expressed genes  
593 identified within the black, lightgreen, and tan modules were not captured in this study. As this  
594 study was primarily focused on BRD development and severity, the genes within these three

595 modules may possess a role in other disease complexes or immune-mediated events, such as  
596 gastrointestinal or apoptotic/necrotic diseases.

597 Utilizing hub gene and interaction network analyses, we further identified genes related  
598 to BRD development and severity. Here, we detected and mapped 52 genes into a protein-protein  
599 interaction network, further stratified into 11 distinct clusters based on their combined interaction  
600 scores. This procedure helps describe the physical relationship that multiple BRD-associated  
601 gene products possess with one another in a more holistic approach. Here, we may infer that  
602 these interactions possess accompanying transient functions involved in BRD development not  
603 previously described in literature. As such, these predicted protein-protein network interactions  
604 may infer potential modular units which participate in BRD development or resistance [80,81].  
605 Further evidence of the associative importance related to BRD development exists with these  
606 genes, as *CXCL12* [20], *TLL2* [20], *ALOX15* [18,20,40], and *LOC100298356* [72,78,79,82] have  
607 been previously identified as differentially expressed when comparing cattle with and without  
608 BRD development. Proteomic approaches have detailed that proteins infrequently operate as  
609 single biological entities and, when involved in similar biological functions, interact in dynamic,  
610 yet organized complexes [83,84,85,86]. As such, these findings provide candidate protein  
611 complexes related to BRD development and severity, which warrants further investigation for  
612 avenues of confirmation in larger populations of cattle and novel therapeutic target development.

613

## 614 Conclusions

615 This study was conducted to utilize systems biology methodology to further establish  
616 genes, mechanisms, and coordinated biological complexes associated with dynamic  
617 hematological changes and BRD development. Utilizing our previously published RNA-Seq data  
618 and WGCNA, we identified five well-preserved modules of highly co-expressed genes with  
619 significant associations with hematological and clinical traits in cattle at facility arrival. The  
620 “steelblue” module, containing genes involved in alpha-beta T cell receptor complex and  
621 negative regulation of fibroblast growth factor receptor signaling, possessed significant positive  
622 correlations with erythrocyte count, platelet count, red cell width, and BRD diagnosis, and  
623 negative correlation with days at risk for BRD. The “purple” module, containing genes involved

624 in mitochondrial processes and non-coding RNA processing and maturation, possessed  
625 significant correlation with increased eosinophil percentage, decreased neutrophil-lymphocyte  
626 ratio, and increased growth rate (weight gain over time). Protein-protein interaction network and  
627 clustering analyses of BRD-related hub genes identified possible at-arrival biological complexes  
628 strongly associated with BRD development; many of these hub genes have been described as  
629 differentially expressed genes in previous BRD research. Through this holistic molecular  
630 approach, we provide genes, mechanisms, and predicted protein complexes associated with BRD  
631 development and performance which are warranted for future analyses targeted in predicting  
632 BRD at facility arrival.

633

## 634 Acknowledgements

635 This work was supported by the Animal Health and Disease Program [Grant no. 2020-67016-  
636 31469] from the USDA National Institute of Food and Agriculture. The authors thank William  
637 Crosby, Kirsten Midkiff, Alexis Thompson, Joseph Gerlach, Merrilee Thoresen, and the  
638 supporting staff at the Mississippi State University College of Veterinary Medicine Clinical  
639 Pathology Laboratory for their technical assistance and insights throughout this study. The  
640 authors would also thank students and staff of the Mississippi Agricultural and Forestry  
641 Experiment Station (MAFES) and Mississippi State University Animal and Dairy Science  
642 Department for their assistance in animal care and sample collection.

643

## 644 Data availability

645 The data utilized in this study are found in the National Center for Biotechnology Information  
646 Gene Expression Omnibus (NCBI-GEO), accession number GSE161396. All data and code used  
647 for running experimental analyses are found on a GitHub repository at  
648 <https://github.com/mscott16/2022-BRD-WGCNA> and archived on Zenodo (DOI:

649 10.5072/zenodo.1015612). All remaining relevant data are found within the paper and its  
650 additional files.

651

## 652 Additional Files

653 Supplemental Table S1: **Clinical metadata of cattle selected for WGCNA analysis**

654 Supplemental Table S2: **CBC and leukocyte distribution data of cattle selected for WGCNA  
655 analysis**

656 Supplemental Table S3: **Full gene list and weighted module assignment**

657 Supplemental Table S4: **Functional enrichment analysis of the five well-preserved modules**

658 Supplemental Table S5: **Hub gene analysis of all five BRD-associated modules**

659 Supplemental Table S6: **STRING identifiers and physical interaction scores  
660 (combined\_score  $\geq$  0.200)**

661

662 Supplemental Figure S1: **Heatmap and hierarchical clustering of clinical and hematological  
663 data across the 23 cattle utilized for transcriptome network analysis**

664 Standardized connectivity was calculated from network adjacency matrices and used to classify  
665 potential outliers ( $Z_k < -5$ ); no animal was identified as an outlier. The remaining rows represent  
666 the numerical values of all clinical and hematological traits across each animal. Colors indicate  
667 an increase (yellow/white) or decreased (purple/black) value for each trait; Sex and BRD are  
668 both represented as a value of 1 for bulls and Yes, and 0 for steers and No, respectively.

669

670 Supplemental Figure S2: **Soft threshold ( $\beta$ ) selection for signed weighed correlation network  
671 construction through scale free topology (SFT) plot analysis**

672 A) SFT index  $R^2$  (y-axis) at increasing soft threshold powers ( $\beta$ ; x-axis). The value  $\beta=8$  was  
673 selected, seen where the saturation curve is above 0.8 (orange horizontal line). B) Increasing soft  
674 threshold powers ( $\beta$ ; x-axis) with respect to decreasing mean connectivity (y-axis). The goal of

675 selecting a value  $\beta$  is to maximize scale independence (i.e., suppress low correlations) while  
676 simultaneously minimizing loss in mean connectivity.

677

## 678 Author Contributions

679 Conceptualization: MAS, ARW, ADP, BN; Methodology: MAS, ARW, CES, ADP, BN; Sample  
680 and data curation: MAS, ARW, AF, BBK; Computational and statistical analysis: MAS; Animal  
681 maintenance and treatment supervision: MAS, ARW, BBK; Project supervision: MAS, ARW,  
682 AF, BBK; Writing – original draft preparation: MAS; Writing – Review & Editing: All authors  
683 read and approved the final manuscript.

684

## 685 Competing Interests

686 The author declares that he has no conflict of interest.

687

## 688 References

- 689 1. Loneragan GH, Dargatz DA, Morley PS, Smith MA. Trends in mortality ratios among cattle in  
690 US feedlots. *Journal of the American Veterinary Medical Association*. 2001 Oct; 219(8):1122–7.  
691
- 692 2. Brooks KR, Raper KC, Ward CE, Holland BP, Krehbiel CR, Step DL. Economic effects of  
693 bovine respiratory disease on feedlot cattle during backgrounding and finishing phases. *The*  
694 *Professional Animal Scientist*. 2011 Jun; 27(3):195–203.  
695
- 696 3. Griffin D. Economic Impact Associated with Respiratory Disease in Beef Cattle. *Veterinary*  
697 *Clinics of North America: Food Animal Practice*. 1997 Nov; 13(3):367–77.  
698
- 699 4. Cortes JA, Hendrick S, Janzen E, Pajor EA, Orsel K. Economic impact of digital dermatitis,  
700 foot rot, and bovine respiratory disease in feedlot cattle. *Translational Animal Science*. 2021 Apr  
701 1; 5(2):txab076.  
702
- 703 5. Taylor JD, Fulton RW, Lehenbauer TW, Step DL, Confer AW. The epidemiology of bovine  
704 respiratory disease: What is the evidence for predisposing factors? *Can Vet J*. 2010 Oct;  
705 51(10):1095–102.  
706



- 707 6. Grissett GP, White BJ, Larson RL. Structured literature review of responses of cattle to viral  
708 and bacterial pathogens causing bovine respiratory disease complex. *J Vet Intern Med.* 2015  
709 May; 29(3):770–80.  
710
- 711 7. McGill JL, Sacco RE. The immunology of bovine respiratory disease. *Veterinary Clinics of*  
712 *North America: Food Animal Practice.* 2020 Jul; 36(2):333–48.  
713
- 714 8. Nobrega D, Andres-Lasheras S, Zaheer R, McAllister T, Homerosky E, Anholt RM, et al.  
715 Prevalence, risk factors, and antimicrobial resistance profile of respiratory pathogens isolated  
716 from suckling beef calves to reprocessing at the feedlot: a longitudinal study. *Front Vet Sci.* 2021  
717 Nov 2; 8:764701.  
718
- 719 9. Mulliniks T, Funston R. *Developmental Programming in Livestock Production, An Issue of*  
720 *Veterinary Clinics of North America: Food Animal Practice - Ebook.* 2019.  
721
- 722 10. USDA. Part IV: Health and Health Management on U.S. Feedlots with a Capacity of 1,000  
723 or More Head. USDA-APHIS-VS-CEAH-NAHMS; 2013. (Feedlot 2011).  
724
- 725 11. White BJ, Renter DG. Bayesian Estimation of the Performance of Using Clinical  
726 Observations and Harvest Lung Lesions for Diagnosing Bovine Respiratory Disease in Post-  
727 weaned Beef Calves. *J VET Diagn Invest.* 2009 Jul; 21(4):446–53.  
728
- 729 12. Wolfger B, Timsit E, White BJ, Orsel K. A Systematic Review of Bovine Respiratory  
730 Disease Diagnosis Focused on Diagnostic Confirmation, Early Detection, and Prediction of  
731 Unfavorable Outcomes in Feedlot Cattle. *Veterinary Clinics of North America: Food Animal*  
732 *Practice.* 2015 Nov; 31(3):351–65.  
733
- 734 13. Gifford CA, Holland BP, Mills RL, Maxwell CL, Farney JK, Terrill SJ, et al. GROWTH  
735 AND DEVELOPMENT SYMPOSIUM: Impacts of inflammation on cattle growth and carcass  
736 merit. *Journal of Animal Science.* 2012 May 1; 90(5):1438–51.  
737
- 738 14. Liew C-C, Ma J, Tang H-C, Zheng R, Dempsey AA. The peripheral blood transcriptome  
739 dynamically reflects system wide biology: a potential diagnostic tool. *Journal of Laboratory and*  
740 *Clinical Medicine.* 2006 Mar; 147(3):126–32.  
741
- 742 15. Tan L-L, Lyon AR. Role of Biomarkers in Prediction of Cardiotoxicity During Cancer  
743 Treatment. *Curr Treat Options Cardio Med.* 2018 Jul; 20(7):55.  
744
- 745 16. Richeson JT, Pinedo PJ, Kegley EB, Powell JG, Gadberry MS, Beck PA, et al. Association  
746 of hematologic variables and castration status at the time of arrival at a research facility with the  
747 risk of bovine respiratory disease in beef calves. *Journal of the American Veterinary Medical*  
748 *Association.* 2013 Oct; 243(7):1035–41.  
749
- 750 17. Lindholm-Perry AK, Kuehn LA, McDanel TG, Miles JR, Workman AM, Chitko-McKown  
751 CG, et al. Complete blood count data and leukocyte expression of cytokine genes and cytokine

- 752 receptor genes associated with bovine respiratory disease in calves. *BMC Res Notes*. 2018 Dec;  
753 11(1):786.  
754
- 755 18. Sun H-Z, Srithayakumar V, Jiminez J, Jin W, Hosseini A, Raszek M, et al. Longitudinal  
756 blood transcriptomic analysis to identify molecular regulatory patterns of bovine respiratory  
757 disease in beef cattle. *Genomics*. 2020 Nov; 112(6):3968–77.  
758
- 759 19. Jiminez J, Timsit E, Orsel K, van der Meer F, Guan LL, Plastow G. Whole-Blood  
760 Transcriptome Analysis of Feedlot Cattle With and Without Bovine Respiratory Disease. *Front*  
761 *Genet*. 2021 Mar 8; 12:627623.  
762
- 763 20. Scott MA, Woolums AR, Swiderski CE, Perkins AD, Nanduri B, Smith DR, et al.  
764 Multipopulational transcriptome analysis of post-weaned beef cattle at arrival further validates  
765 candidate biomarkers for predicting clinical bovine respiratory disease. *Sci Rep*. 2021 Dec;  
766 11(1):23877.  
767
- 768 21. Tieri P, Farina L, Petti M, Astolfi L, Paci P, Castiglione F. Network Inference and  
769 Reconstruction in Bioinformatics. In: *Encyclopedia of Bioinformatics and Computational*  
770 *Biology*. Elsevier; 2019. pp. 805–13.  
771
- 772 22. Farber CR, Mesner LD. A Systems-Level Understanding of Cardiovascular Disease through  
773 Networks. In: *Translational Cardiometabolic Genomic Medicine*. Elsevier; 2016. pp. 59–81.  
774
- 775 23. Kadarmideen HN, Watson-haigh NS. Building gene co-expression networks using  
776 transcriptomics data for systems biology investigations: Comparison of methods using  
777 microarray data. *Bioinformatics*. 2012 Sep 21; 8(18):855–61.  
778
- 779 24. Hasankhani A, Bahrami A, Sheybani N, Fatehi F, Abadeh R, Ghaem Maghami Farahani H,  
780 et al. Integrated Network Analysis to Identify Key Modules and Potential Hub Genes Involved in  
781 Bovine Respiratory Disease: A Systems Biology Approach. *Front Genet*. 2021 Oct 18;  
782 12:753839.  
783
- 784 25. Andrews S. FastQC: A quality control tool for high throughput sequence data. 2019.  
785 Available from: <http://www.bioinformatics.babraham.ac.uk/projects/fastqc/>  
786
- 787 26. Bolger AM, Lohse M, Usadel B. Trimmomatic: a flexible trimmer for Illumina sequence  
788 data. *Bioinformatics*. 2014 Aug 1; 30(15):2114–20.  
789
- 790 27. Kim D, Langmead B, Salzberg SL. HISAT: a fast spliced aligner with low memory  
791 requirements. *Nat Methods*. 2015 Apr; 12(4):357–60.  
792
- 793 28. Kim D, Paggi JM, Park C, Bennett C, Salzberg SL. Graph-based genome alignment and  
794 genotyping with HISAT2 and HISAT-genotype. *Nat Biotechnol*. 2019 Aug; 37(8):907–15.  
795

- 796 29. Pertea M, Pertea GM, Antonescu CM, Chang T-C, Mendell JT, Salzberg SL. StringTie  
797 enables improved reconstruction of a transcriptome from RNA-seq reads. *Nat Biotechnol.* 2015  
798 Mar; 33(3):290–5.  
799
- 800 30. Kovaka S, Zimin AV, Pertea GM, Razaghi R, Salzberg SL, Pertea M. Transcriptome  
801 assembly from long-read RNA-seq alignments with StringTie2. *Genome Biol.* 2019 Dec;  
802 20(1):278.  
803
- 804 31. Pertea G. prepDE.py. 2019. Available from:  
805 <https://github.com/gpertea/stringtie/blob/master/prepDE.py>  
806
- 807 32. Chen Y, Lun ATL, Smyth GK. From reads to genes to pathways: differential expression  
808 analysis of RNA-Seq experiments using Rsubread and the edgeR quasi-likelihood pipeline .  
809 F1000Research; 2016 Aug . Report No.: 5:1438.  
810
- 811 33. Robinson MD, McCarthy DJ, Smyth GK. edgeR: a Bioconductor package for differential  
812 expression analysis of digital gene expression data. *Bioinformatics.* 2010 Jan 1; 26(1):139–40.  
813
- 814 34. McCarthy DJ, Chen Y, Smyth GK. Differential expression analysis of multifactor RNA-Seq  
815 experiments with respect to biological variation. *Nucleic Acids Research.* 2012 May 1;  
816 40(10):4288–97.  
817
- 818 35. Langfelder P, Horvath S. WGCNA: an R package for weighted correlation network analysis.  
819 *BMC Bioinformatics.* 2008 Dec; 9(1):559.  
820
- 821 36. Horvath S. Weighted network analysis: application in genomics and systems biology. New  
822 York, NY: Springer; 2011.  
823
- 824 37. Mason MJ, Fan G, Plath K, Zhou Q, Horvath S. Signed weighted gene co-expression  
825 network analysis of transcriptional regulation in murine embryonic stem cells. *BMC Genomics.*  
826 2009 Dec; 10(1):327.  
827
- 828 38. Langfelder P, Horvath S. Eigengene networks for studying the relationships between co-  
829 expression modules. *BMC Syst Biol.* 2007 Dec; 1(1):54.  
830
- 831 39. Garnier S, Ross N, Rudis B, Filipovic-Pierucci A, Galili T, Greenwell B, et al. viridis. 2021.  
832 Available from: <https://github.com/sjmgarnier/viridis/tree/v0.6.1CRAN>  
833
- 834 40. Scott MA, Woolums AR, Swiderski CE, Perkins AD, Nanduri B, Smith DR, et al. Whole  
835 blood transcriptomic analysis of beef cattle at arrival identifies potential predictive molecules

- 836 and mechanisms that indicate animals that naturally resist bovine respiratory disease. PLoS  
837 ONE. 2020 Jan 13; 15(1):e0227507.  
838
- 839 41. Scott M, Woolums A, Swiderski C, Thompson A, Perkins A, Nanduri B, et al. Use of  
840 nCounter mRNA Profiling to Identify at-arrival Gene Expression Patterns for Predicting Bovine  
841 Respiratory Disease in Beef Cattle. In Review; 2021 Sep. Available from:  
842 <https://www.researchsquare.com/article/rs-923361/v1>  
843
- 844 42. Langfelder P, Luo R, Oldham MC, Horvath S. Is My Network Module Preserved and  
845 Reproducible? Bourne PE, editor. PLoS Comput Biol. 2011 Jan 20; 7(1):e1001057.  
846
- 847 43. Horvath S, Dong J. Geometric Interpretation of Gene Coexpression Network Analysis.  
848 Miyano S, editor. PLoS Comput Biol. 2008 Aug 15; 4(8):e1000117.  
849
- 850 44. Liao Y, Wang J, Jaehnig EJ, Shi Z, Zhang B. WebGestalt 2019: gene set analysis toolkit with  
851 revamped UIs and APIs. Nucleic Acids Research. 2019 Jul 2; 47(W1):W199–205.  
852
- 853 45. Jassal B, Matthews L, Viteri G, Gong C, Lorente P, Fabregat A, et al. The reactome pathway  
854 knowledgebase. Nucleic Acids Research. 2019 Nov 6; gkz1031.  
855
- 856 46. Bakhtiarizadeh MR, Mirzaei S, Norouzi M, Sheybani N, Vafaei Sadi MS. Identification of  
857 Gene Modules and Hub Genes Involved in Mastitis Development Using a Systems Biology  
858 Approach. Front Genet. 2020 Jul 13; 11:722.  
859
- 860 47. Uribe-Querol E, Rosales C. Phagocytosis: Our Current Understanding of a Universal  
861 Biological Process. Front Immunol. 2020 Jun 2; 11:1066.  
862
- 863 48. Szklarczyk D, Gable AL, Nastou KC, Lyon D, Kirsch R, Pyysalo S, et al. The STRING  
864 database in 2021: customizable protein–protein networks, and functional characterization of  
865 user-uploaded gene/measurement sets. Nucleic Acids Research. 2021 Jan 8; 49(D1):D605–12.  
866
- 867 49. Brohée S, van Helden J. Evaluation of clustering algorithms for protein-protein interaction  
868 networks. BMC Bioinformatics. 2006 Dec; 7(1):488.  
869
- 870 50. Shapiro SS, Wilk MB. An analysis of variance test for normality (complete samples).  
871 Biometrika. 1965 Dec 1; 52(3–4):591–611.  
872
- 873 51. Amrine DE, McLellan JG, White BJ, Larson RL, Renter DG, Sanderson M. Evaluation of  
874 three classification models to predict risk class of cattle cohorts developing bovine respiratory  
875 disease within the first 14 days on feed using on-arrival and/or pre-arrival information.  
876 Computers and Electronics in Agriculture. 2019 Jan; 156:439–46.

877

878 52. Abell KM, Theurer ME, Larson RL, White BJ, Apley M. A mixed treatment comparison  
879 meta-analysis of metaphylaxis treatments for bovine respiratory disease in beef cattle<sup>1,2</sup>. *Journal*  
880 *of Animal Science*. 2017 Feb 1; 95(2):626–35.

881

882 53. Zygmuntowicz A, Burmańczuk A, Markiewicz W. Selected Biological Medicinal Products  
883 and Their Veterinary Use. *Animals*. 2020 Dec 9; 10(12):2343.

884

885 54. Martin B. Effect of Zelnote Administered as a Metaphylactic upon Initial Processing of High-  
886 Risk, Newly Received Beef Calves on Performance and Morbidity [Animal Science  
887 Undergraduate Honors Theses]. University of Arkansas; 2020. Available from:

888 <https://scholarworks.uark.edu/anscuht/41/>

889

890 55. Gaspers J, Swanson K, Keomanivong F, Fontoura A, Ward A, Knutson E, et al. Evaluation  
891 of response to vaccination with a bacterial-produced plasmid DNA, Zelnote, on feedlot  
892 performance of weaned calves . North Dakota State University; 2016 p. 9–11. (2016 North  
893 Dakota Beef Report). Report No.: AS1815. Available from:

894 <https://www.ag.ndsu.edu/publications/livestock/2016-north-dakota-beef-report>

895

896 56. Lippolis K, Cooke R, Marques R, Brandão A, Schubach K, Bohnert D. Feeding  
897 immunostimulant ingredients to optimize health and performance of receiving cattle . Oregon  
898 State University; 2017 p. 9–13. (Oregon Beef Council Report). Report No.: BEEF153. Available  
899 from: <https://blogs.oregonstate.edu/beefcattle/research-reports/>

900

901 57. Coetzee JF, Magstadt DR, Sidhu PK, Follett L, Schuler AM, Krull AC, et al. Association  
902 between antimicrobial drug class for treatment and retreatment of bovine respiratory disease  
903 (BRD) and frequency of resistant BRD pathogen isolation from veterinary diagnostic laboratory  
904 samples. Munderloh UG, editor. *PLoS ONE*. 2019 Dec 13; 14(12):e0219104.

905

906 58. Coetzee JF, Cernicchiaro N, Sidhu PK, Kleinhenz MD. Association between antimicrobial  
907 drug class selection for treatment and retreatment of bovine respiratory disease and health,  
908 performance, and carcass quality outcomes in feedlot cattle. *Journal of Animal Science*. 2020  
909 Apr 1; 98(4):skaa109.

910

911 59. Liew C-C, Ma J, Tang H-C, Zheng R, Dempsey AA. The peripheral blood transcriptome  
912 dynamically reflects system wide biology: a potential diagnostic tool. *Journal of Laboratory and*  
913 *Clinical Medicine*. 2006 Mar; 147(3):126–32.

914

915 60. Obeidat M, Nie Y, Chen V, Shannon CP, Andiappan AK, Lee B, et al. Network-based  
916 analysis reveals novel gene signatures in peripheral blood of patients with chronic obstructive  
917 pulmonary disease. *Respir Res*. 2017 Dec; 18(1):72.

918

919 61. Latimer KS, Duncan JR, Prasse KW. Duncan & Prasse's veterinary laboratory medicine:  
920 clinical pathology. 5th ed. Chichester, West Sussex, UK: Wiley-Blackwell; 2011. pp. 509.

921

922 62. Roland L, Drillich M, Iwersen M. Hematology as a diagnostic tool in bovine medicine. J  
923 VET Diagn Invest. 2014 Sep; 26(5):592–8.

924

925 63. Jones M. Interpreting ruminant bloodwork. In: Proceedings of VetFest 2020 . Australian  
926 Veterinary Association; p. 184–9. Available from:

927 [https://vetfest.ava.com.au/client\\_uploads/jones-m-interpreting-ruminant-bloodwork-24a65b87-  
928 8843-4ccf-b309-cfe519183589/download](https://vetfest.ava.com.au/client_uploads/jones-m-interpreting-ruminant-bloodwork-24a65b87-8843-4ccf-b309-cfe519183589/download)

929

930 64. Spare MR, Hanzlicek GA, Wootten KL, Anderson GA, Thomson DU, Sanderson MW, et al.  
931 Bovine anaplasmosis herd prevalence and management practices as risk-factors associated with  
932 herd disease status. Veterinary Parasitology. 2020; 277:100021.

933

934 65. Okafor CC, Collins SL, Daniel JA, Coetzee JF, Whitlock BK. Seroprevalence of bovine  
935 Anaplasmosis in Georgia. Veterinary Parasitology: Regional Studies and Reports. 2019 Jan;  
936 15:100258.

937

938 66. Hosokawa H, Rothenberg EV. How transcription factors drive choice of the T cell fate. Nat  
939 Rev Immunol. 2021 Mar; 21(3):162–76.

940

941 67. Pasman Y, Merico D, Kaushik AK. Preferential expression of IGHV and IGHD encoding  
942 antibodies with exceptionally long CDR3H and a rapid global shift in transcriptome  
943 characterizes development of bovine neonatal immunity. Developmental & Comparative  
944 Immunology. 2017 Feb; 67:495–507.

945

946 68. Tindemans I, Serafini N, Di Santo JP, Hendriks RW. GATA-3 Function in Innate and  
947 Adaptive Immunity. Immunity. 2014 Aug; 41(2):191–206.

948

949 69. Hosoya T, Maillard I, Engel JD. From the cradle to the grave: activities of GATA-3  
950 throughout T-cell development and differentiation: GATA-3 regulates multiple stages of T-cell  
951 development. Immunological Reviews. 2010 Nov; 238(1):110–25.

952

953 70. Li P, Zheng S, Jiang C, Zhou S, Tian H, Zhang G, et al. Th2 lymphocytes migrating to the  
954 bone marrow under high-altitude hypoxia promote erythropoiesis via activin A and interleukin-9.  
955 Experimental Hematology. 2014 Sep; 42(9):804–15.

956



- 957 71. Guo Z, González JF, Hernandez JN, McNeilly TN, Corripio-Miyar Y, Frew D, et al. Possible  
958 mechanisms of host resistance to *Haemonchus contortus* infection in sheep breeds native to the  
959 Canary Islands. *Sci Rep*. 2016 Sep; 6(1):26200.  
960
- 961 72. Scott MA, Woolums AR, Swiderski CE, Perkins AD, Nanduri B, Smith DR, et al.  
962 Comprehensive at-arrival transcriptomic analysis of post-weaned beef cattle uncovers type I  
963 interferon and antiviral mechanisms associated with bovine respiratory disease mortality. Ortega-  
964 Villaizan M del M, editor. *PLoS ONE*. 2021 Apr 26; 16(4):e0250758.  
965
- 966 73. Diehl S, Rincón M. The two faces of IL-6 on Th1/Th2 differentiation. *Molecular*  
967 *Immunology*. 2002 Dec; 39(9):531–6.  
968
- 969 74. Gershwin LJ, Berghaus LJ, Arnold K, Anderson ML, Corbeil LB. Immune mechanisms of  
970 pathogenetic synergy in concurrent bovine pulmonary infection with *Haemophilus somnus* and  
971 bovine respiratory syncytial virus. *Veterinary Immunology and Immunopathology*. 2005 Aug;  
972 107(1–2):119–30.  
973
- 974 75. McGinley J, Thwaites R, Brebner W, Greenan-Barrett L, Aerssens J, Öner D, et al. A  
975 Systematic Review and Meta-analysis of Animal Studies Investigating the Relationship Between  
976 Serum Antibody, T Lymphocytes, and Respiratory Syncytial Virus Disease. *The Journal of*  
977 *Infectious Diseases*. 2021 Sep 15; jiab370.  
978
- 979 76. Chen C, Yuan J, Ji G, Zhang S, Gao Z. Amphioxus ribosomal proteins RPS15, RPS18,  
980 RPS19 and RPS30-precursor act as immune effectors via killing or agglutinating bacteria. *Fish &*  
981 *Shellfish Immunology*. 2021 Nov; 118:147–54.  
982
- 983 77. Xu X, Xiong X, Sun Y. The role of ribosomal proteins in the regulation of cell proliferation,  
984 tumorigenesis, and genomic integrity. *Sci China Life Sci*. 2016 Jul; 59(7):656–72.  
985
- 986 78. Behura SK, Tizioto PC, Kim J, Grupioni NV, Seabury CM, Schnabel RD, et al. Tissue  
987 Tropism in Host Transcriptional Response to Members of the Bovine Respiratory Disease  
988 Complex. *Sci Rep*. 2017 Dec; 7(1):17938.  
989
- 990 79. Scott MA, Woolums AR, Swiderski CE, Perkins AD, Nanduri B. Genes and regulatory  
991 mechanisms associated with experimentally-induced bovine respiratory disease identified using  
992 supervised machine learning methodology. *Sci Rep*. 2021 Dec; 11(1):22916.  
993
- 994 80. Spirin V, Mirny LA. Protein complexes and functional modules in molecular networks.  
995 *Proceedings of the National Academy of Sciences*. 2003 Oct 14; 100(21):12123–8.  
996
- 997 81. Maulik U, Basu S, Ray S. Identifying protein complexes in PPI network using non-  
998 cooperative sequential game. *Sci Rep*. 2017 Dec; 7(1):8410.  
999



- 1000 82. Tizioto PC, Kim J, Seabury CM, Schnabel RD, Gershwin LJ, Van Eenennaam AL, et al.  
1001 Immunological Response to Single Pathogen Challenge with Agents of the Bovine Respiratory  
1002 Disease Complex: An RNA-Sequence Analysis of the Bronchial Lymph Node Transcriptome.  
1003 Harrod K, editor. PLoS ONE. 2015 Jun 29; 10(6):e0131459.  
1004
- 1005 83. Lei X, Wang F, Wu F-X, Zhang A, Pedrycz W. Protein complex identification through  
1006 Markov clustering with firefly algorithm on dynamic protein–protein interaction networks.  
1007 Information Sciences. 2016 Feb; 329:303–16.  
1008
- 1009 84. Zhang A. Protein interaction networks: computational analysis. Cambridge ; New York:  
1010 Cambridge University Press; 2009. Pp. 278.  
1011
- 1012 85. Tu S, Chen R, Xu L. A binary matrix factorization algorithm for protein complex prediction.  
1013 Proteome Sci. 2011 Dec; 9(S1):S18.  
1014
- 1015 86. Poyatos JF, Hurst LD. How biologically relevant are interaction-based modules in protein  
1016 networks? Genome Biol. 2004; 5(11):R93.  
1017

Cluster Dendrogram of 12,795 Genes

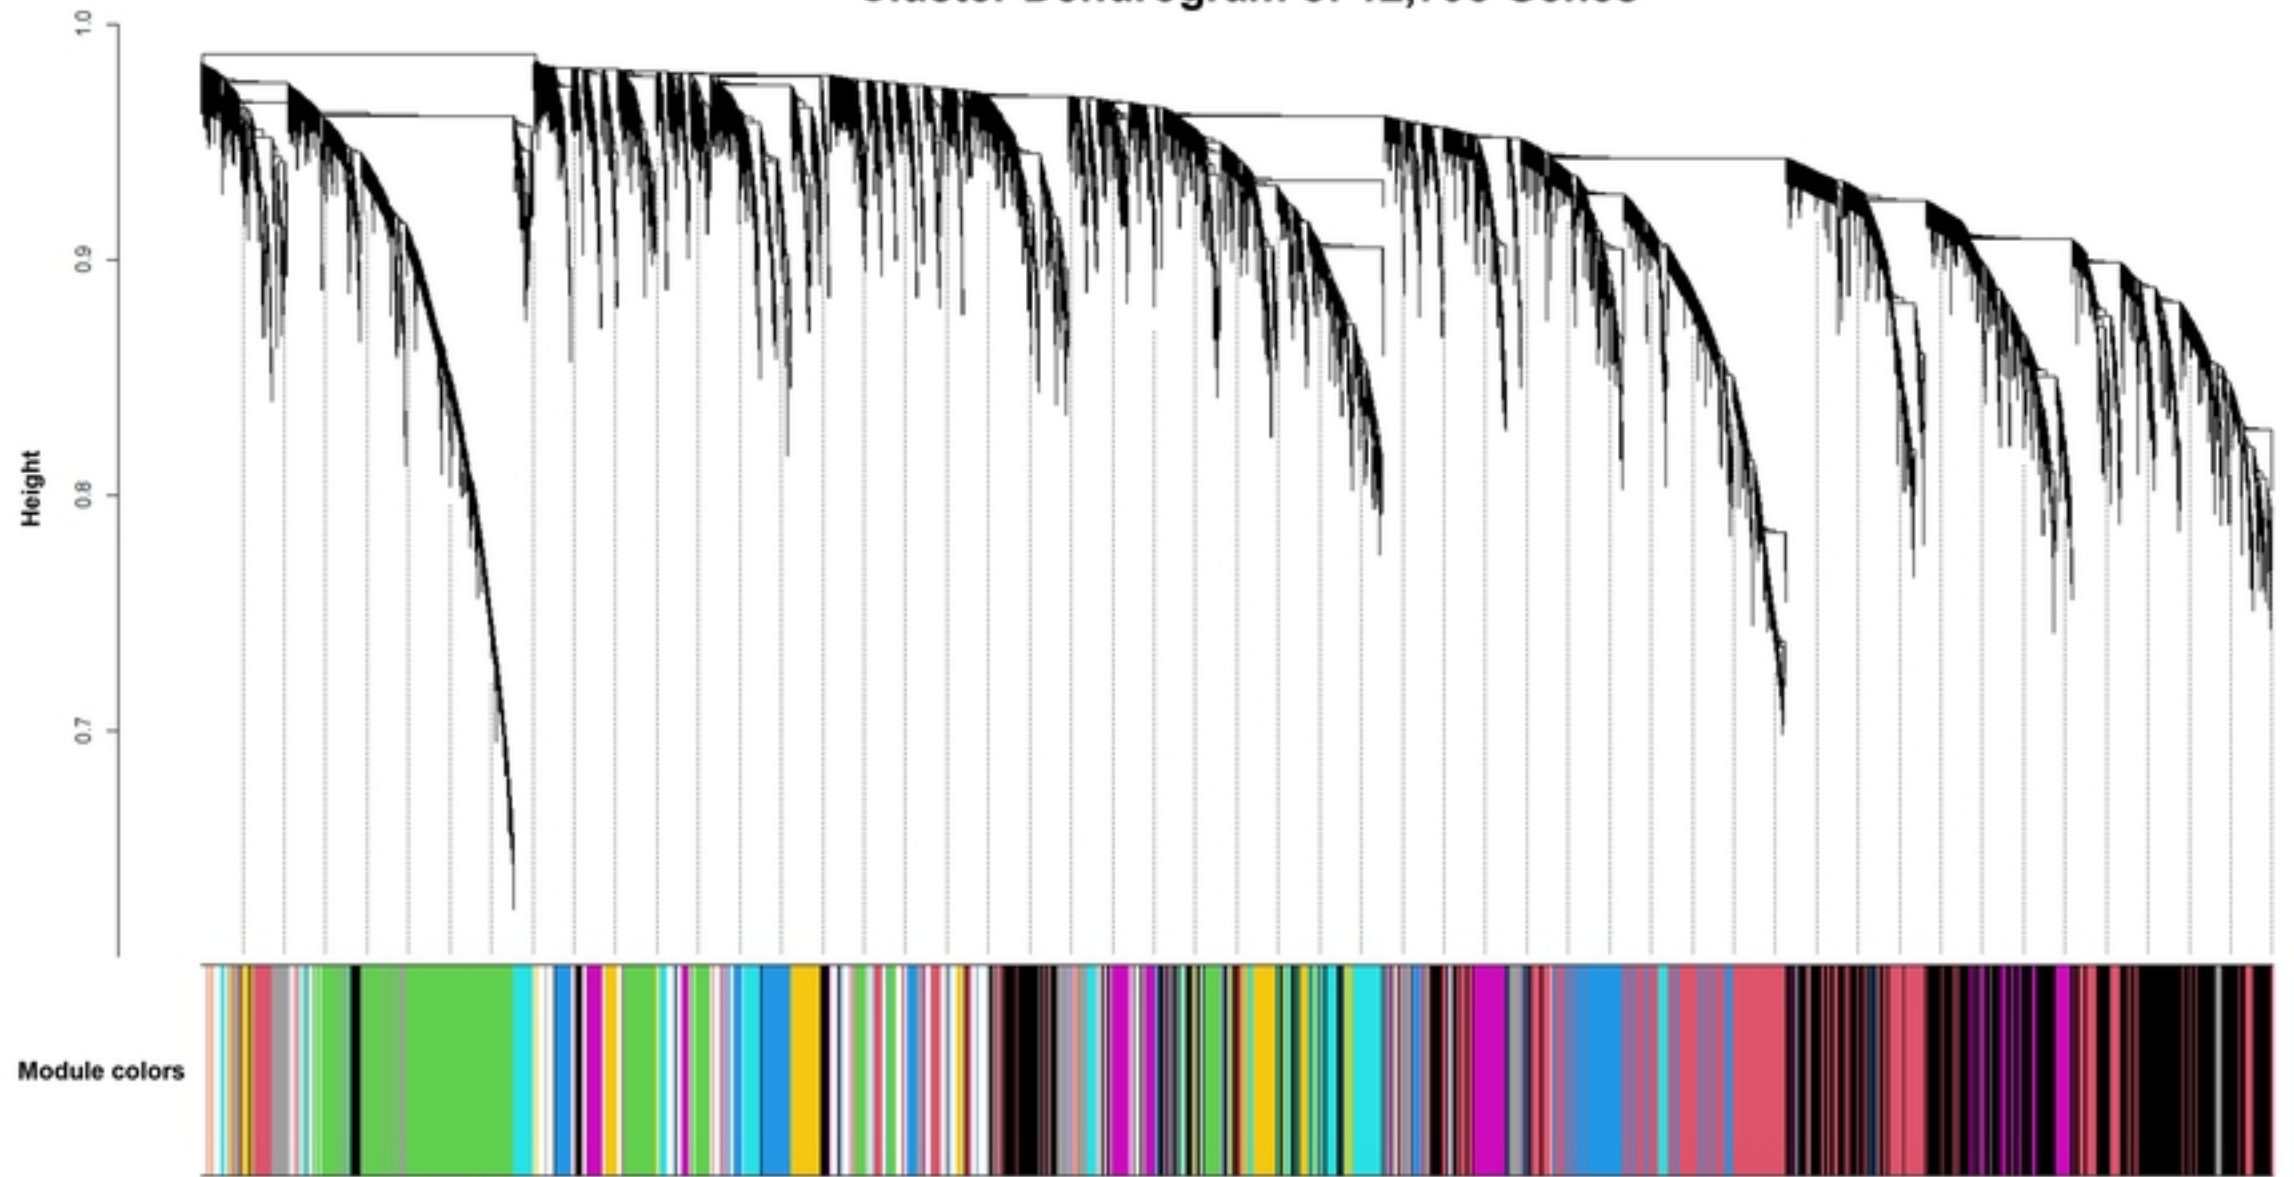

Figure 1



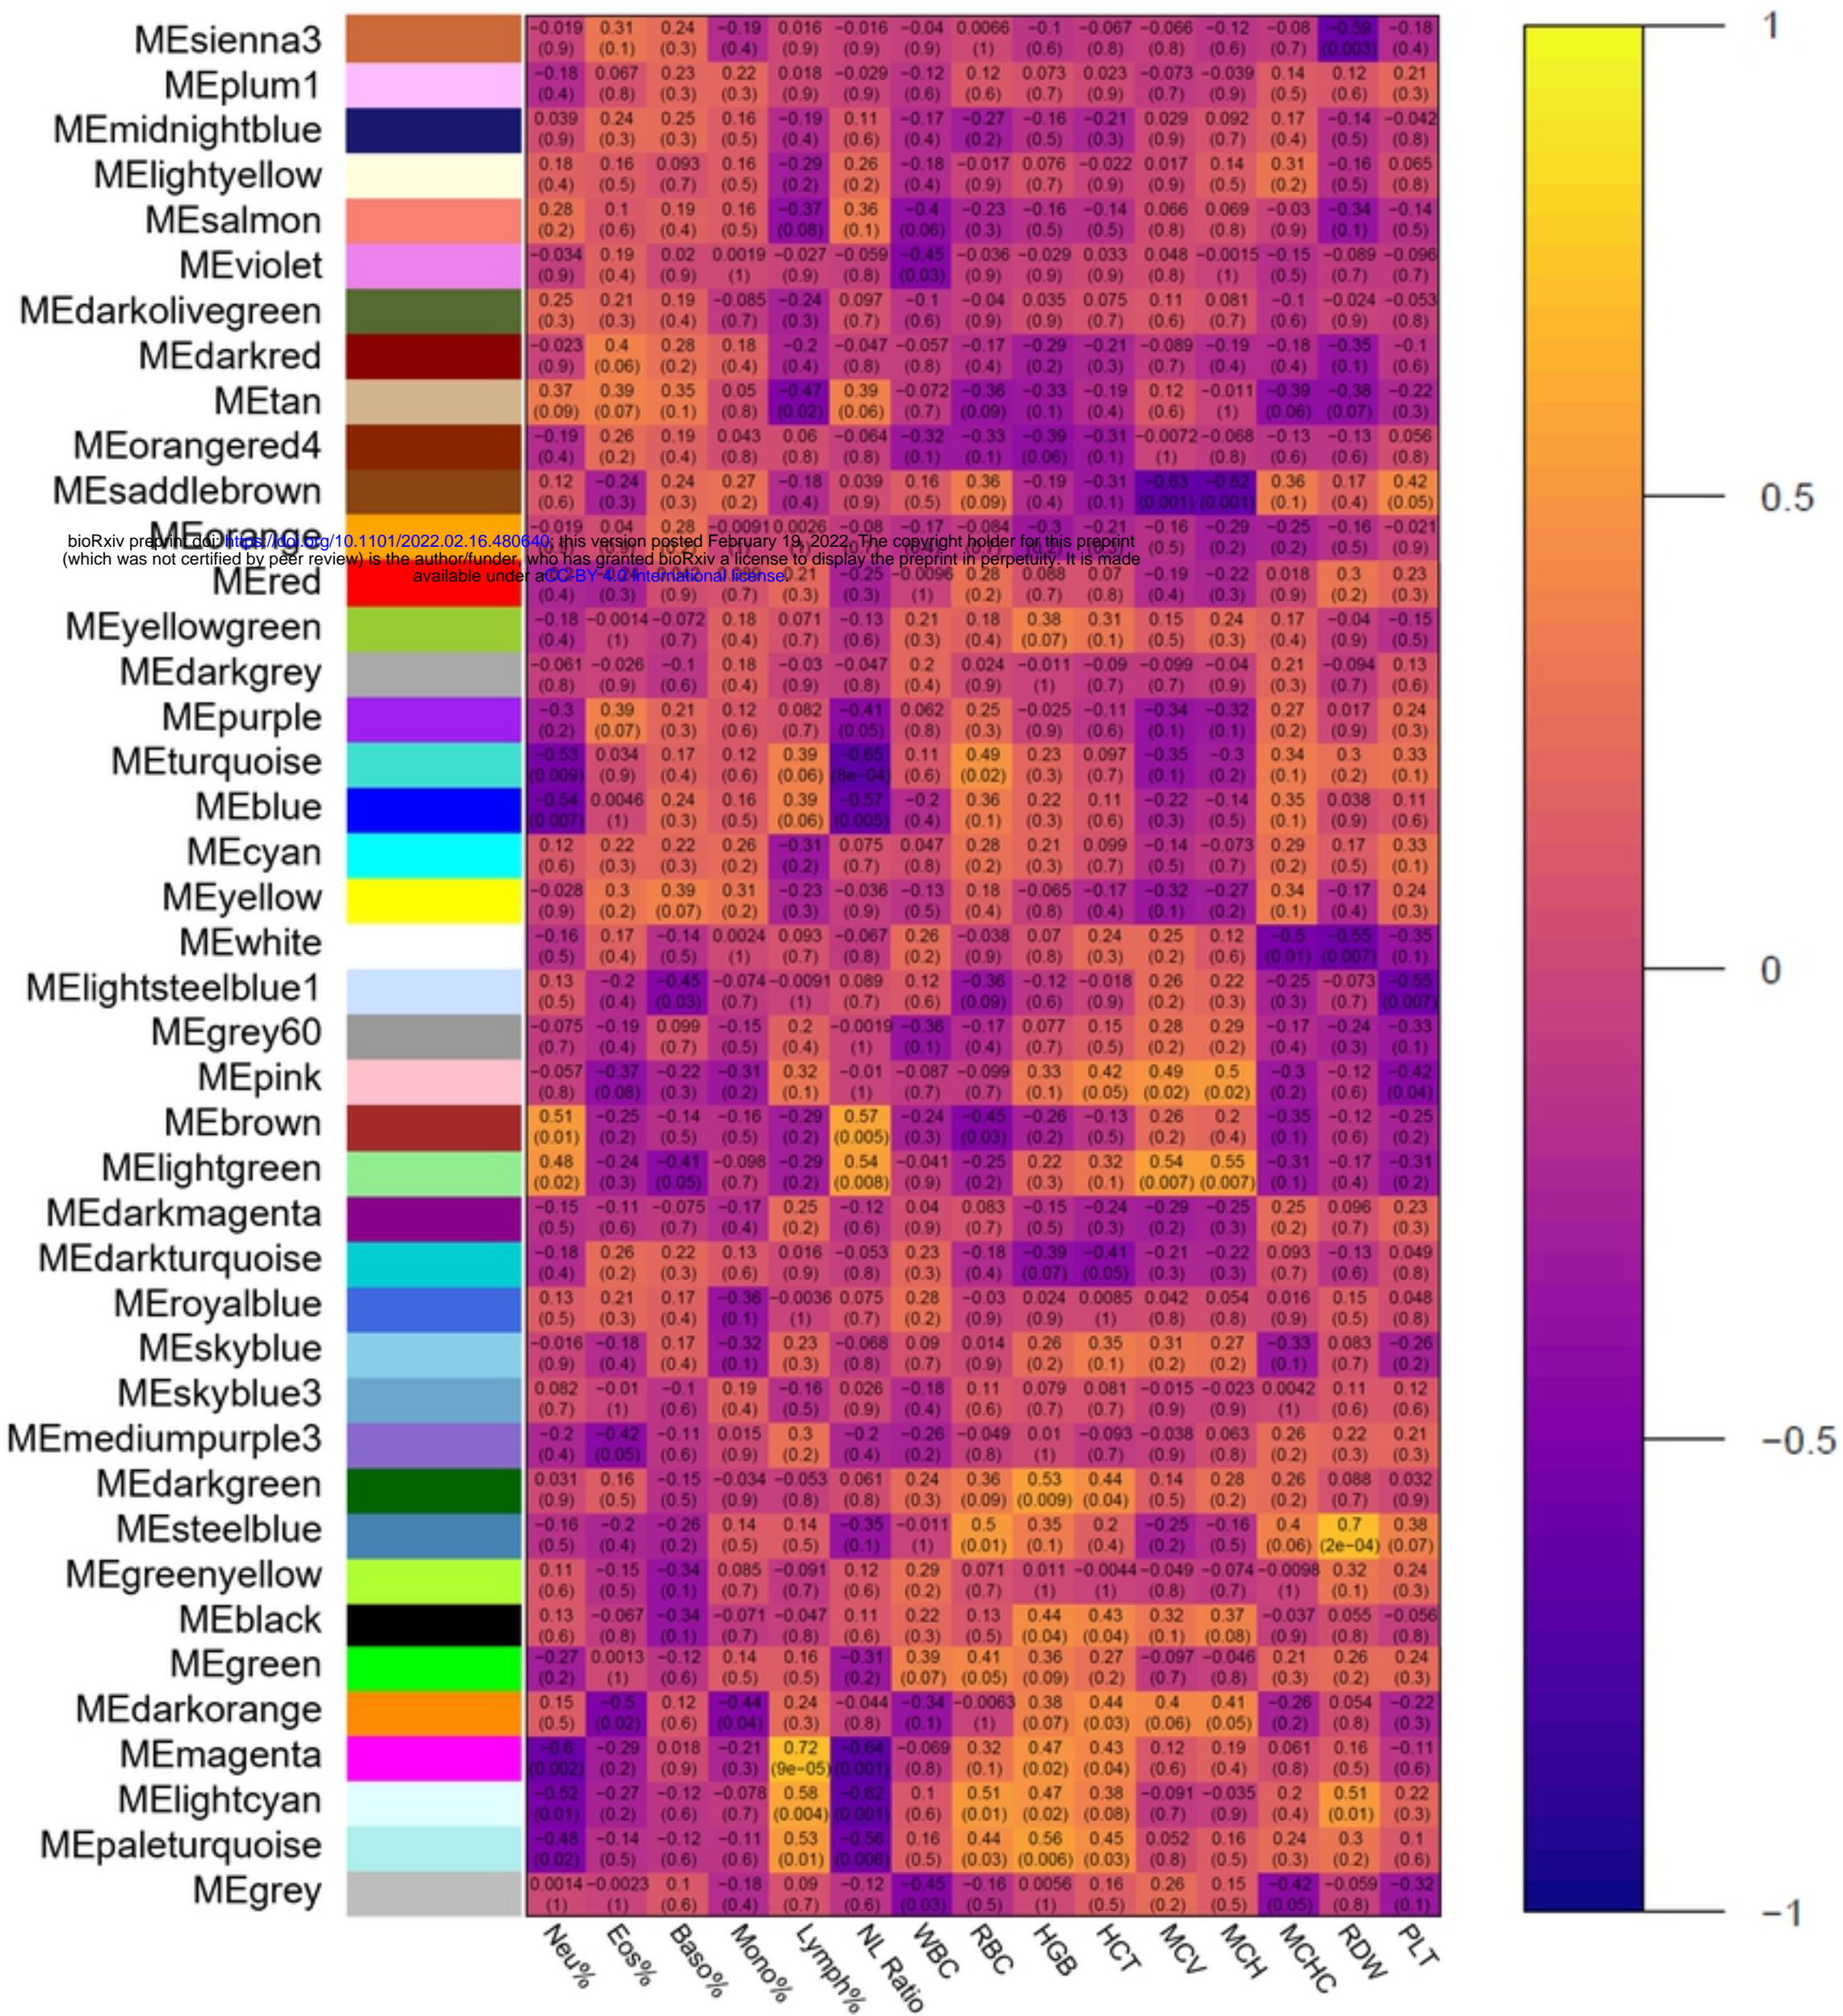

Figure 2



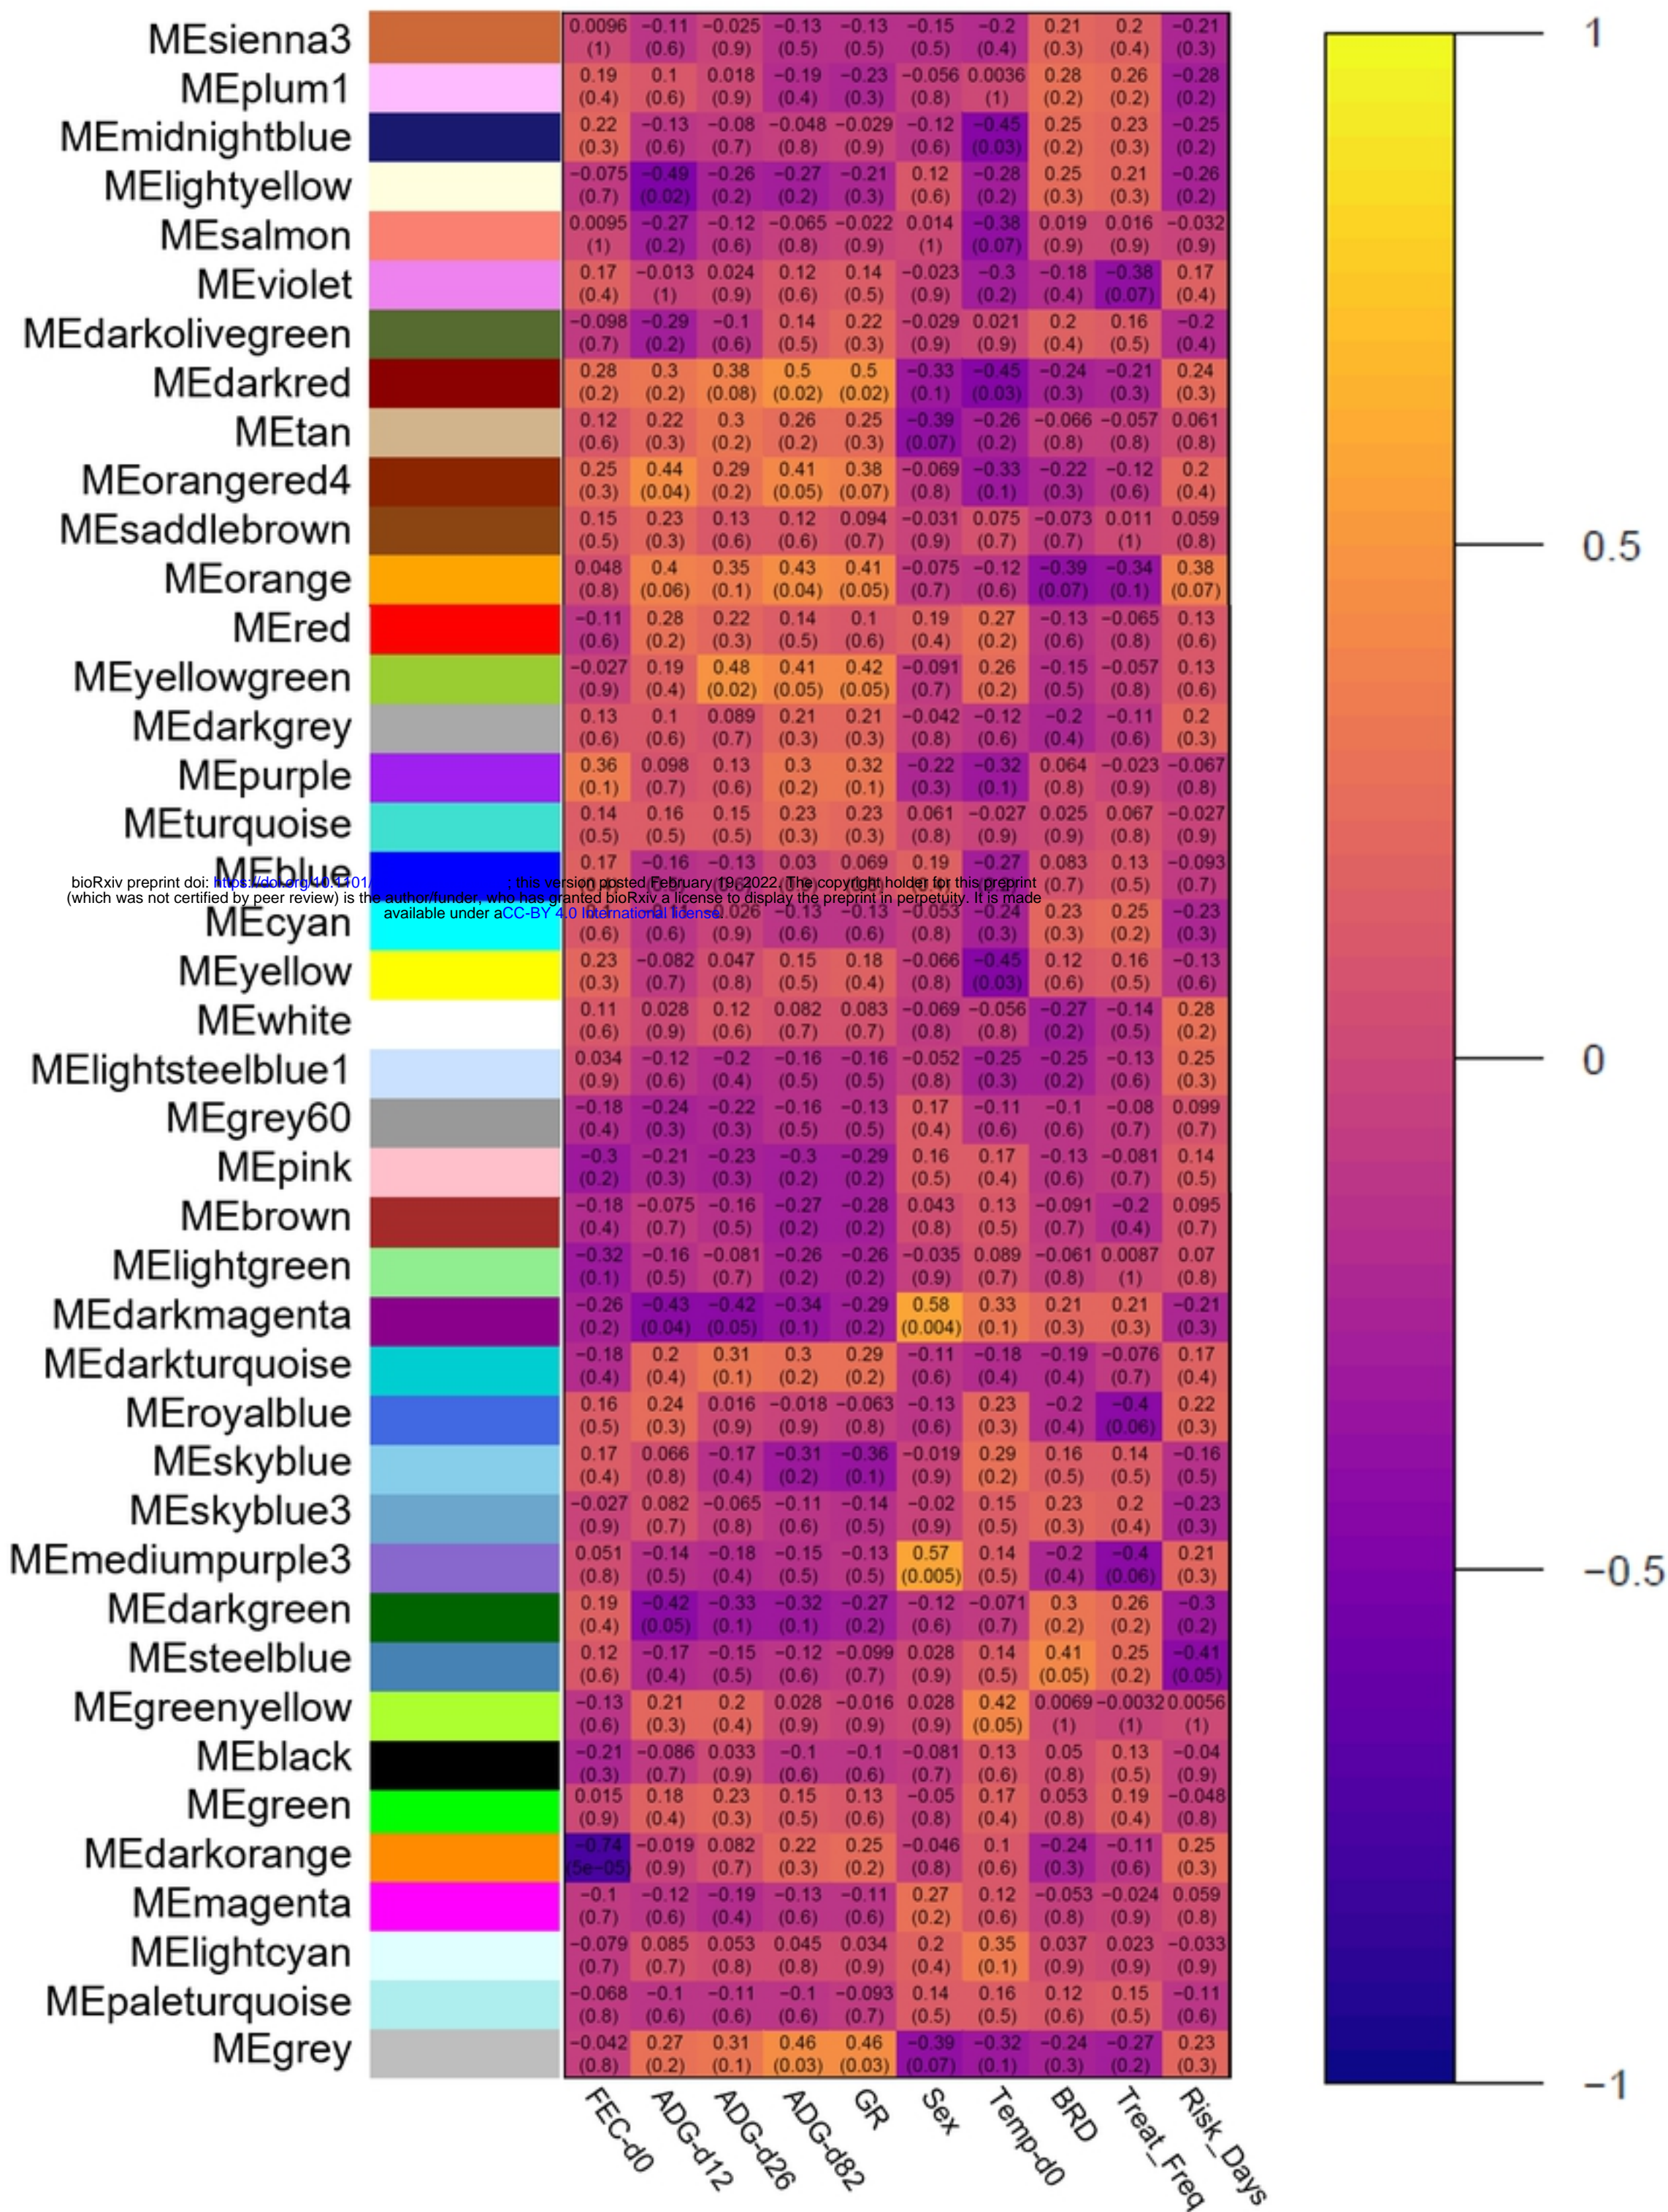

Figure 3

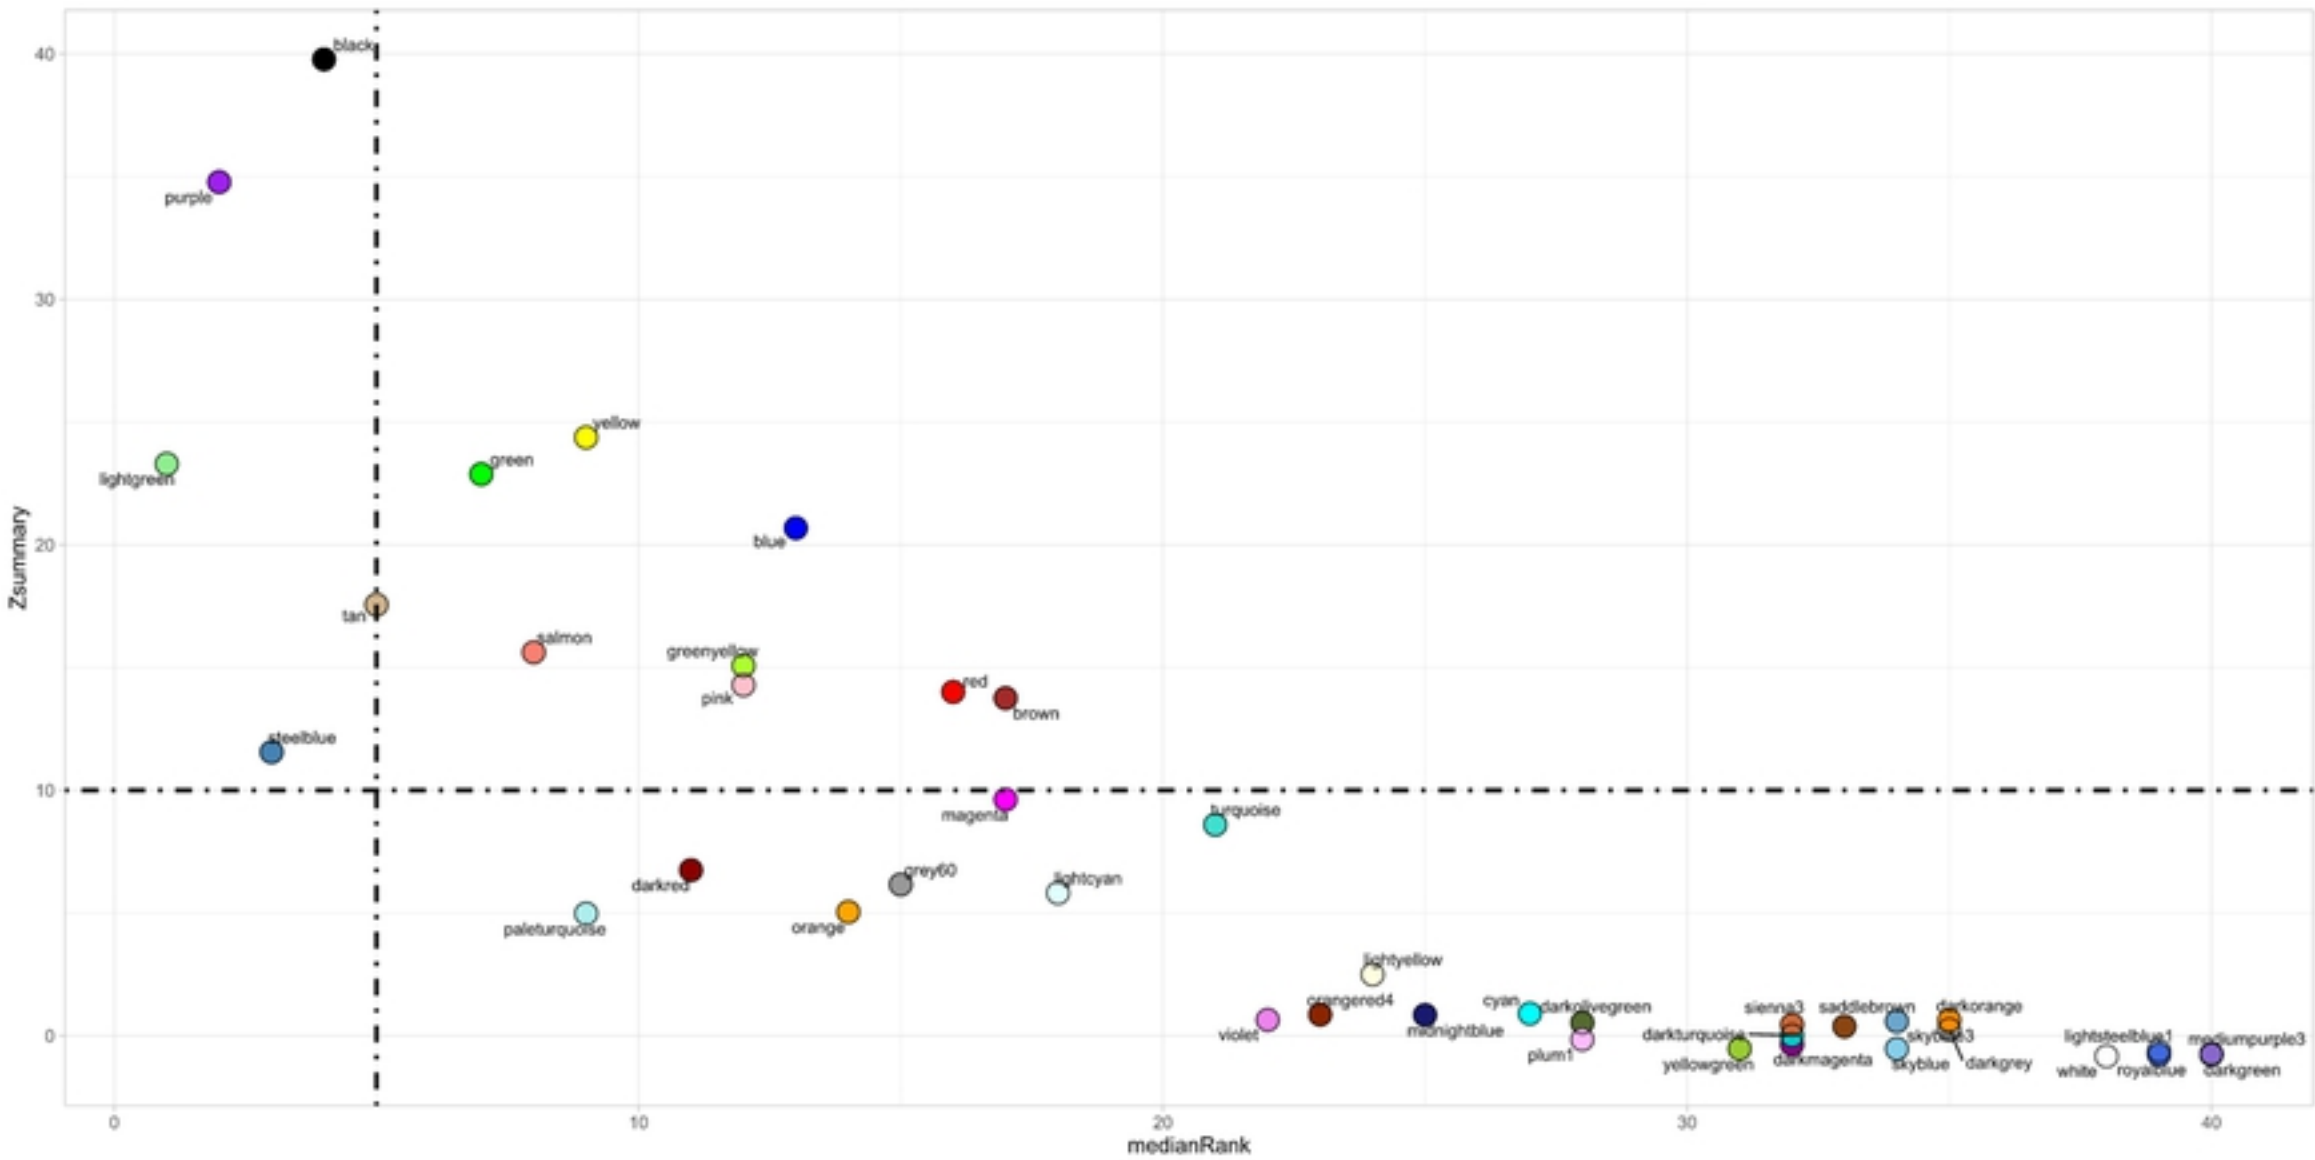

Figure 4



| Color           | Cluster ID | Count | Protein Names                                                                              |
|-----------------|------------|-------|--------------------------------------------------------------------------------------------|
| Red             | Cluster 1  | 12    | ALKBH2, FUS, HNRNPDL, KIAA1524, LRSAM1, PAPOLA, RBM22, RBM25, RNF113A, SRSF5, SRSF9, SUGP1 |
| Brown           | Cluster 2  | 11    | ABL2, ANKRD28, ARID4B, BLK, BLNK, CD247, ENAH, KAT5, MDM4, PSD3, RHOBTB1                   |
| Dark Golden Rod | Cluster 3  | 8     | ANAPC5, FOXO1, GSTM4, JUN, SOX4, ZNF362, ZNF462, ZSCAN12                                   |
| Green-Yellow    | Cluster 4  | 5     | ALOX15, DBN1, LDLRAP1, LRP5, WNT5A                                                         |
| Lime Green      | Cluster 5  | 4     | BTRC, CUL1, KLHDC8A, LOC100298356                                                          |
| Light Green     | Cluster 6  | 2     | CXCL12, GPR161                                                                             |
| Green           | Cluster 7  | 2     | ADSS, PGM3                                                                                 |
| Cyan            | Cluster 8  | 2     | POT1, TINF2                                                                                |
| Blue            | Cluster 9  | 2     | MBD2, WDR20                                                                                |
| Purple          | Cluster 10 | 2     | IRF2BP2, SOX13                                                                             |
| Pink            | Cluster 11 | 2     | ETF1, RPLP0                                                                                |

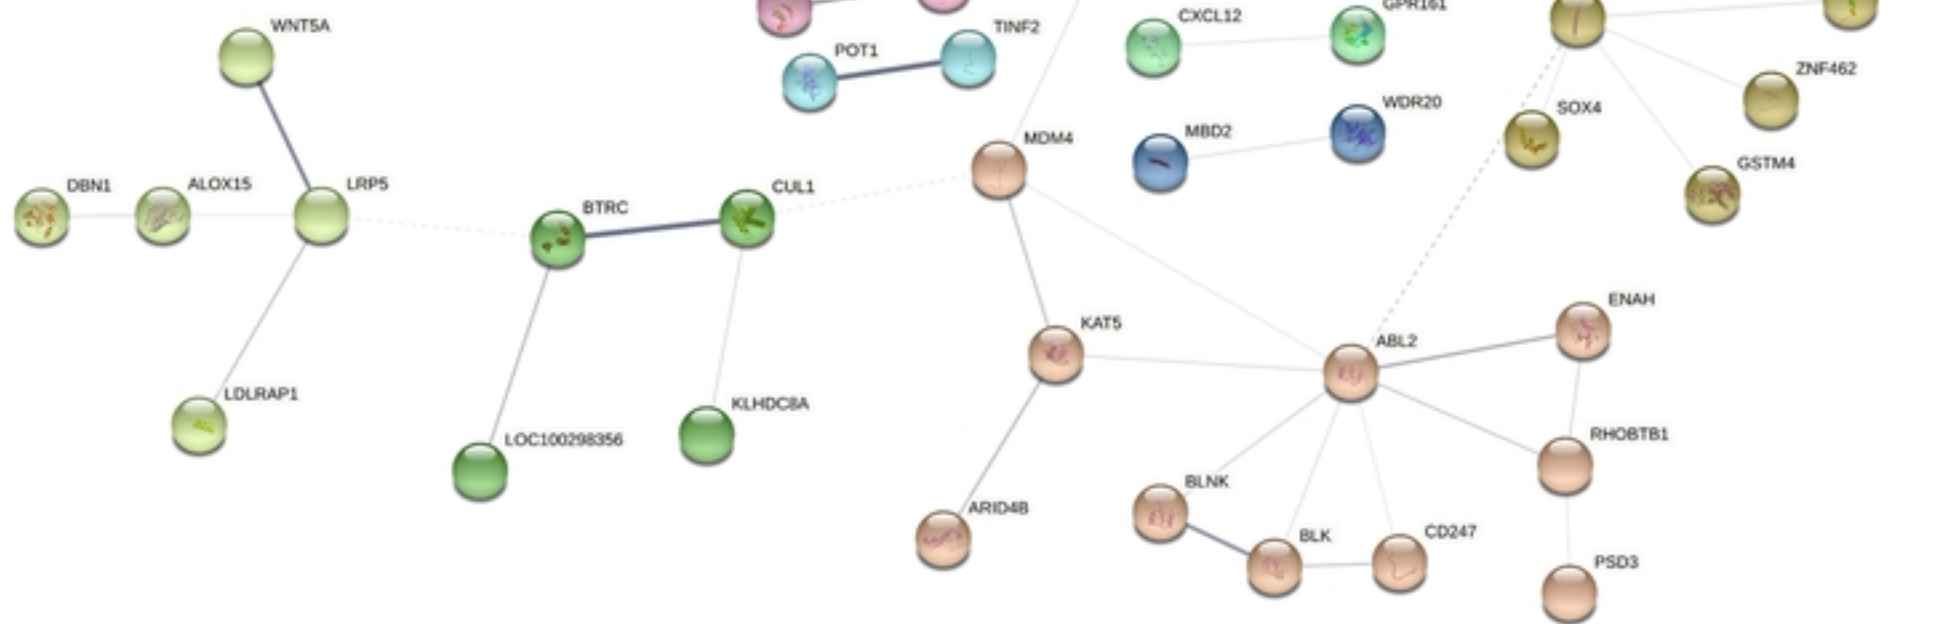

Figure 5

Sample dendrogram and trait heatmap

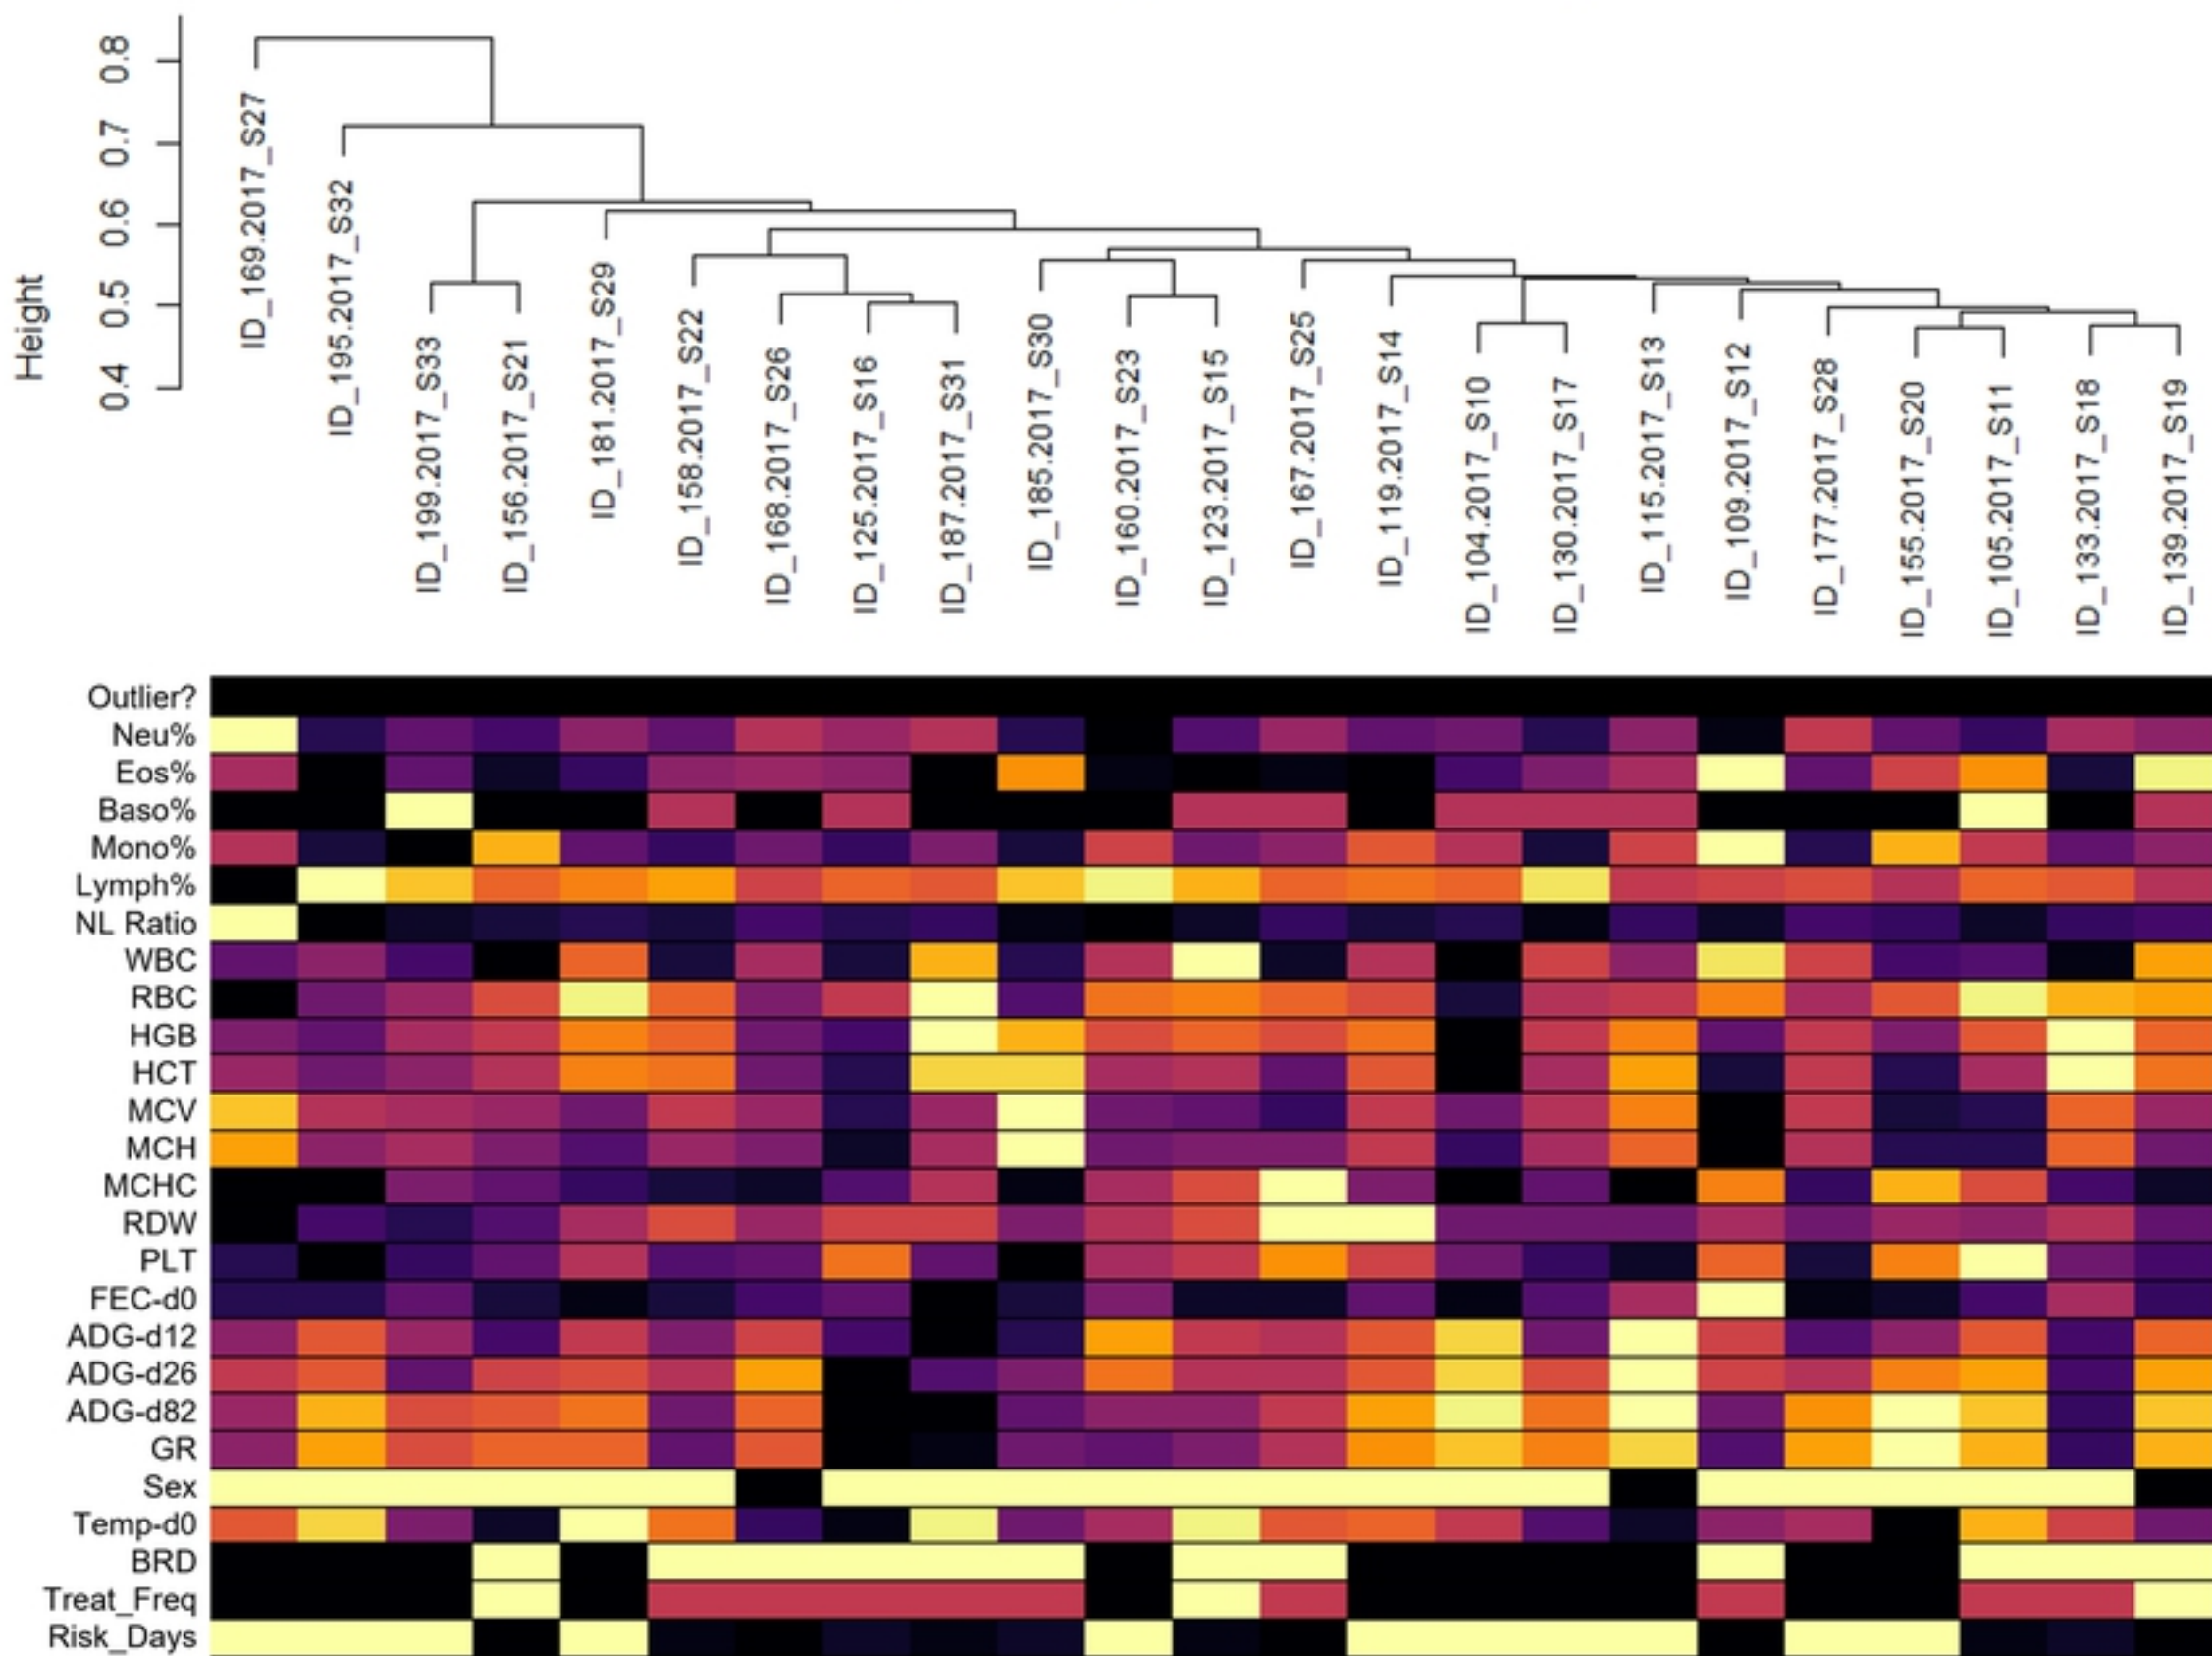

Supplementary Figure S1



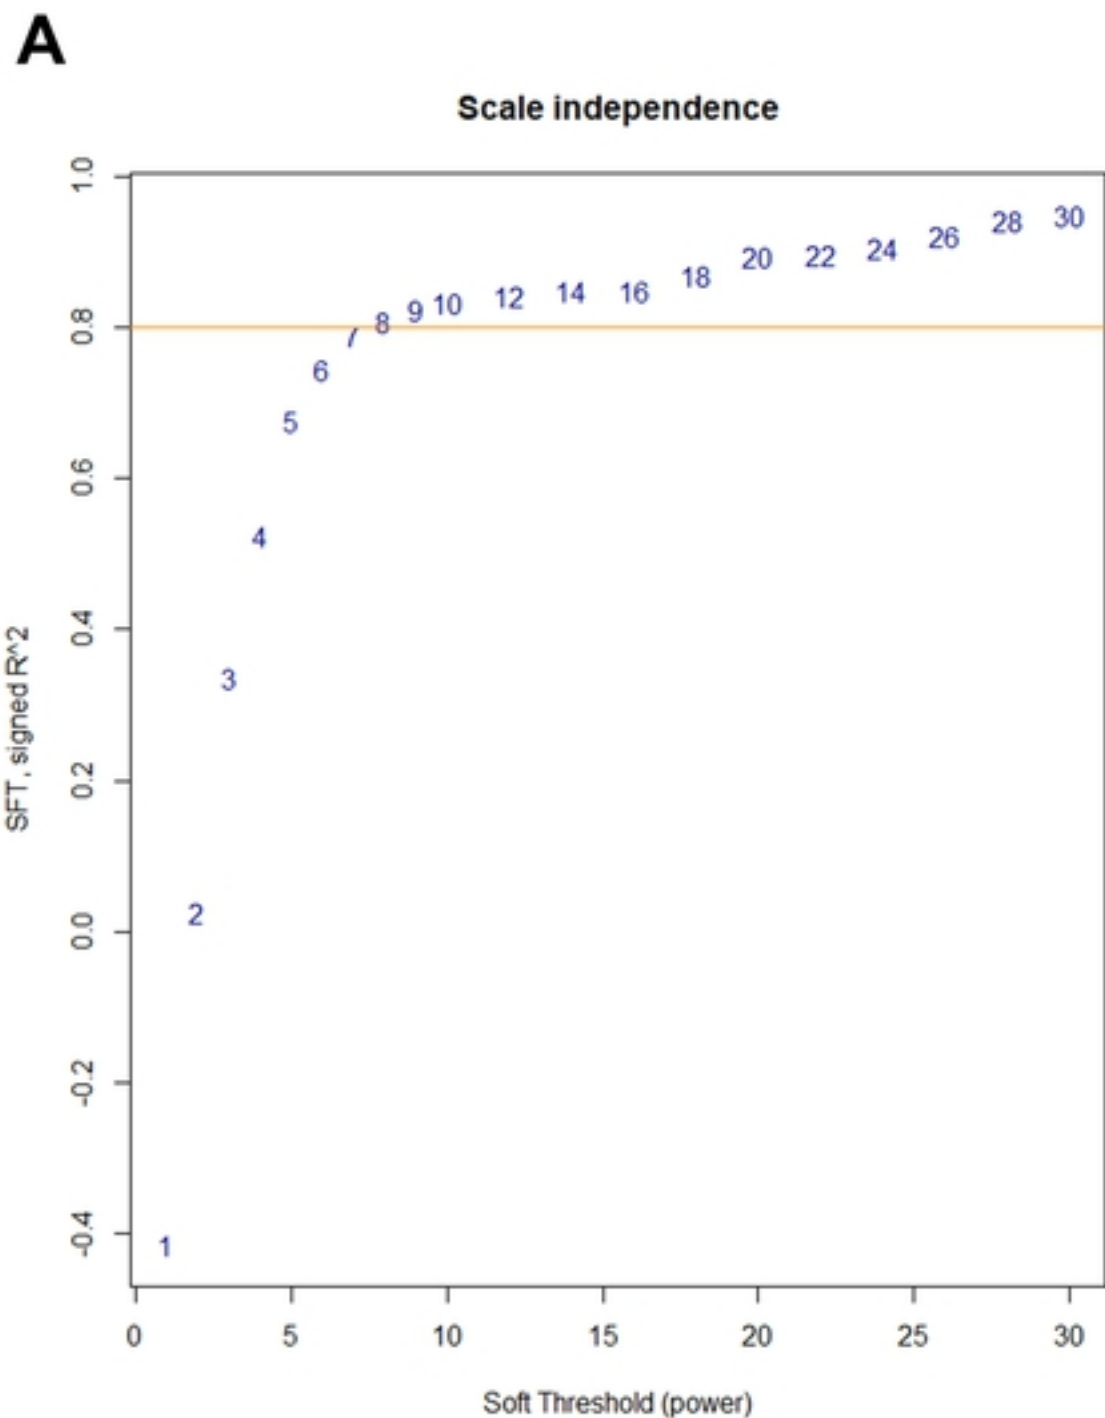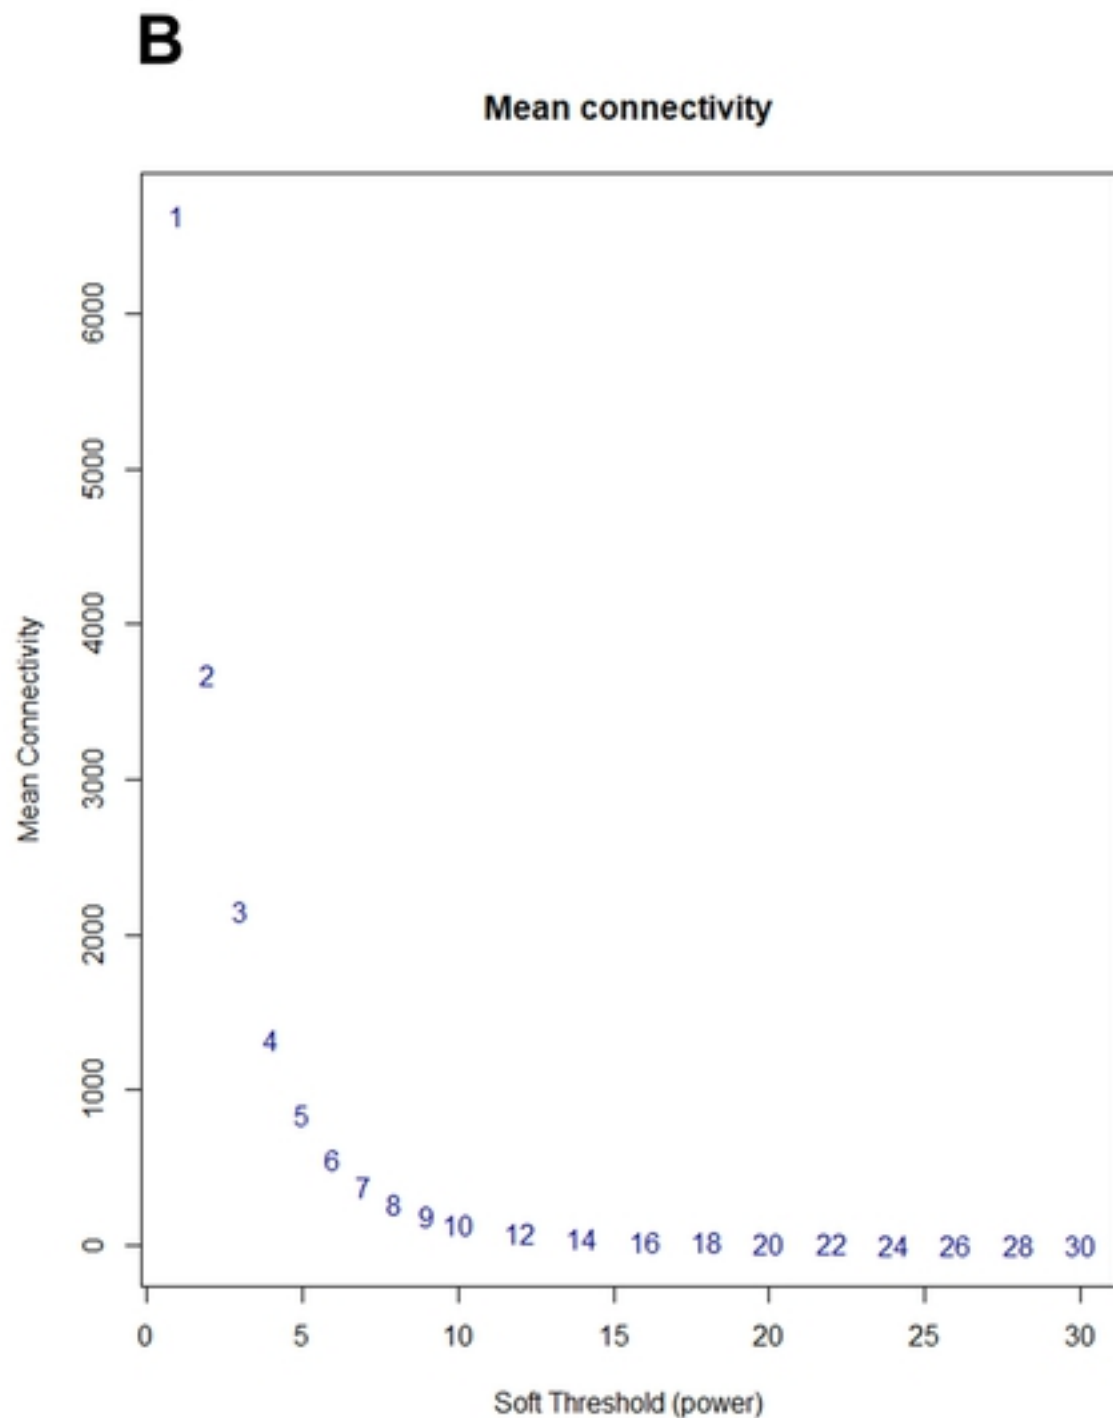

Supplementary Figure S2
